# Supplementary material for: RETurn to work After stroKE (RETAKE) Trial: protocol for a mixed-methods process evaluation using normalisation process theory
Source: PubMed Central journal article supplement (PMC8928258; doi:10.1136/bmjopen-2021-053111), 2022-03-15
Supplement: bmjopen-2021-053111.draft_revisions.pdf [file bmjopen-2021-053111.draft_revisions.pdf]

# BMJ Open

BMJ Open is committed to open peer review. As part of this commitment we make the peer review history of every article we publish publicly available.

When an article is published we post the peer reviewers' comments and the authors' responses online. We also post the versions of the paper that were used during peer review. These are the versions that the peer review comments apply to.

The versions of the paper that follow are the versions that were submitted during the peer review process. They are not the versions of record or the final published versions. They should not be cited or distributed as the published version of this manuscript.

BMJ Open is an open access journal and the full, final, typeset and author-corrected version of record of the manuscript is available on our site with no access controls, subscription charges or pay-per-view fees (<http://bmjopen.bmj.com>).

If you have any questions on BMJ Open's open peer review process please email [info.bmjopen@bmj.com](mailto:info.bmjopen@bmj.com)

# BMJ Open

## The RETURN to work After stroke (RETAKE) Trial: protocol for a mixed-methods process evaluation using normalisation process theory

|                               |                                                                                                                                                                                                                                                                                                                                                                                                                                                                                                                                                                                                                                                                                                                                                                                                                                                                                                                                                                                                                                                                                                                                                                                                                                                                                                                                                            |
|-------------------------------|------------------------------------------------------------------------------------------------------------------------------------------------------------------------------------------------------------------------------------------------------------------------------------------------------------------------------------------------------------------------------------------------------------------------------------------------------------------------------------------------------------------------------------------------------------------------------------------------------------------------------------------------------------------------------------------------------------------------------------------------------------------------------------------------------------------------------------------------------------------------------------------------------------------------------------------------------------------------------------------------------------------------------------------------------------------------------------------------------------------------------------------------------------------------------------------------------------------------------------------------------------------------------------------------------------------------------------------------------------|
| Journal:                      | <i>BMJ Open</i>                                                                                                                                                                                                                                                                                                                                                                                                                                                                                                                                                                                                                                                                                                                                                                                                                                                                                                                                                                                                                                                                                                                                                                                                                                                                                                                                            |
| Manuscript ID                 | bmjopen-2021-053111                                                                                                                                                                                                                                                                                                                                                                                                                                                                                                                                                                                                                                                                                                                                                                                                                                                                                                                                                                                                                                                                                                                                                                                                                                                                                                                                        |
| Article Type:                 | Protocol                                                                                                                                                                                                                                                                                                                                                                                                                                                                                                                                                                                                                                                                                                                                                                                                                                                                                                                                                                                                                                                                                                                                                                                                                                                                                                                                                   |
| Date Submitted by the Author: | 05-May-2021                                                                                                                                                                                                                                                                                                                                                                                                                                                                                                                                                                                                                                                                                                                                                                                                                                                                                                                                                                                                                                                                                                                                                                                                                                                                                                                                                |
| Complete List of Authors:     | <p>Radford, Kathryn A; University of Nottingham<br/> McKevitt, Christopher; King's College London, Department of Public Health Sciences<br/> Clarke, Sara; University of Nottingham, Division of Rehabilitation, Aging and Wellbeing<br/> Powers, Katie; University of Nottingham<br/> Phillips, Julie; University of Nottingham<br/> Craven, Kristelle; University of Nottingham<br/> Watkins, Caroline; University of Central Lancashire, Faculty of Health and Wellbeing<br/> Farrin, Amanda; University of Leeds, Clinical Trials Research Unit<br/> Holmes, Jain; University of Nottingham<br/> Cripps, Rachel; King's College London<br/> McLellan, Vicki; University of Leeds, Clinical Trials Unit<br/> Sach, Tracey; University of East Anglia, School of Chemical Sciences and Pharmacy<br/> Brindle, Richard; University of Leeds, Clinical Trials Unit<br/> Holloway, Ivana; University of Leeds, Clinical Trials Unit<br/> Hartley, Suzanne; University of Leeds, Clinical Trials Research Unit<br/> Bowen, Audrey; The University of Manchester, DNEP, SBS, FBMH<br/> O'Connor, Rory J.; University of Leeds<br/> Stevens, Judith<br/> Walker, Marion; University of Nottingham<br/> Murray, John<br/> Shone, Angela; University of Nottingham<br/> Clarke, David; University of Leeds, Academic Unit of Elderly Care and Rehabilitation</p> |
| Keywords:                     | Stroke < NEUROLOGY, Clinical trials < THERAPEUTICS, STROKE MEDICINE                                                                                                                                                                                                                                                                                                                                                                                                                                                                                                                                                                                                                                                                                                                                                                                                                                                                                                                                                                                                                                                                                                                                                                                                                                                                                        |
|                               |                                                                                                                                                                                                                                                                                                                                                                                                                                                                                                                                                                                                                                                                                                                                                                                                                                                                                                                                                                                                                                                                                                                                                                                                                                                                                                                                                            |

SCHOLARONE™  
Manuscripts

1  
2  
3 1 **TITLE**  
4  
5  
6

7 2 The RETurn to work After stroKE (RETAKE) Trial: protocol for a mixed-methods  
8  
9 3 process evaluation using normalisation process theory  
10  
11  
12 4

13  
14 5 **NAMES OF PROTOCOL CONTRIBUTORS**  
15  
16

17  
18 6 Kathryn A Radford<sup>1\*</sup>, Christopher McKeivitt<sup>9</sup>, Sara Clarke, Katie Powers, Julie  
19  
20 7 Phillips<sup>1</sup>, Kristelle Craven<sup>1</sup>, Caroline Watkins<sup>4</sup>, Amanda Farrin<sup>2</sup>, Jain Holmes<sup>1</sup>,  
21  
22 8 Rachel Cripps<sup>9</sup>, Vicki McLellan<sup>2</sup>, Tracey H Sach<sup>3</sup>, Richard Brindle<sup>2</sup>, Ivana Holloway<sup>2</sup>,  
23  
24 9 Suzanne Hartley<sup>2</sup>, Audrey Bowen<sup>8</sup>, Rory O'Connor<sup>5</sup>, Judith Stevens<sup>6</sup>, Marion  
25  
26 10 Walker<sup>1</sup>, John Murray<sup>7</sup>, Angela Shone<sup>10</sup>, David J Clarke<sup>11</sup>  
27  
28  
29

30 11 \*Correspondence: Kathryn.radford@nottingham.ac.uk  
31  
32

33 12 <sup>1</sup>Division of Rehabilitation, Ageing and wellbeing, School of Medicine, B-Floor,  
34  
35 13 Medical School Queen's Medical Centre, Nottingham NG7 2UH. Full details of  
36  
37 14 authors' information are presented at the end of the article.  
38  
39  
40 15

41  
42 16 WORD COUNT: 3965 (minus abstract, strengths and limitations, tables/figures and  
43  
44 17 references)  
45  
46  
47 18  
48  
49  
50  
51  
52  
53  
54  
55  
56  
57  
58  
59  
60

## 19 **ABSTRACT**

### 20 **Objectives**

21 This mixed-method process evaluation underpinned by Normalisation Process  
22 Theory (NPT) aims to measure fidelity to the intervention, understand the social and  
23 structural context in which the intervention is delivered, and to identify barriers and  
24 facilitators to intervention implementation.

### 25 **Setting**

26 Return to Work after Stroke (RETAKE) is a multi-centre individual patient  
27 randomised controlled trial to determine whether Early Stroke Specialist Vocational  
28 Rehabilitation (ESSVR) plus usual care is a clinically and cost-effective therapy to  
29 help people return to work after stroke, when compared with usual care alone. This  
30 protocol paper describes the embedded process evaluation.

### 31 **Participants and outcome measures**

32 Intervention training for therapists will be observed and use of remote mentor  
33 support reviewed through documentary analysis. Fidelity will be assessed through  
34 participant questionnaires and analysis of therapy records, examining frequency,  
35 length and content of ESSVR sessions. Therapists' attitudes towards evidence-  
36 based practice, their competency to deliver the intervention and identification of  
37 potential sources of contamination will also be evaluated. Longitudinal case studies  
38 incorporating non-participant observations will be conducted with a proportion of  
39 intervention and usual care participants. Semi-structured interviews will be  
40 completed with stroke survivors, carers, occupational therapists, mentors, service  
41 managers and employers. Analysis of qualitative data will draw on thematic and

1  
2  
3 42 Framework approaches. Analysis of quantitative data focused on intervention fidelity  
4  
5 43 will include regression models and descriptive statistics.  
6  
7  
8

## 9 44 **Conclusions**

10  
11 45 Large trials of complex rehabilitation interventions often lack empirical data needed  
12  
13 46 to provide context for interpreting trial outcomes. Embedded process evaluations are  
14  
15 47 vital to understanding factors impacting on, and potentially influencing, trial results.  
16  
17 48 The process evaluation will also identify professional and organisational implications  
18  
19 49 of embedding and sustaining an ESSVR intervention in post-stroke rehabilitation  
20  
21 50 services.  
22  
23  
24  
25

## 26 51 **Trial registration**

27  
28  
29 52 Registration number: ISRCTN: 12464275  
30  
31  
32  
33  
34  
35  
36

## 37 55 **KEYWORDS**

38  
39  
40 56 Return to work, stroke, vocational rehabilitation, occupational therapy, complex  
41  
42 57 intervention, process evaluation, randomised controlled trial, mixed-methods,  
43  
44 58 qualitative, Normalisation Process Theory, Consolidated Framework for  
45  
46 59 Implementation Fidelity  
47  
48  
49  
50  
51  
52

## 53 61 **STRENGTHS AND LIMITATIONS OF THIS STUDY**

- 54  
55 62 • A mixed-methods theory-driven process evaluation will generate detailed  
56  
57 63 findings to assist in interpreting the results of a pragmatic, multi-centre  
58  
59  
60

- 1  
2  
3 64 individual patient randomised controlled trial of a complex vocational  
4  
5 65 rehabilitation intervention, which crosses the work/health divide.  
6  
7  
8 66 • This is one of the most comprehensive multi-site, multi-component, multi-  
9  
10 67 stakeholder perspective process evaluations embedded in a stroke  
11  
12 68 rehabilitation trial, involving detailed assessment of implementation fidelity,  
13  
14 69 therapist competency to deliver the trial intervention, contamination logging  
15  
16  
17 70 and exploration of social and structural influences on intervention provision in  
18  
19 71 post-stroke rehabilitation services.  
20  
21  
22 72 • Longitudinal case studies with intervention and usual care will capture  
23  
24 73 participant experiences of providing and experiencing the intervention  
25  
26 74 including those of employers.  
27  
28  
29 75  
30  
31 76  
32  
33 77  
34  
35  
36

## 37 **BACKGROUND**

38  
39 79 Approximately 100,000 people in the UK suffer from a stroke every year,[1] and  
40  
41  
42 80 around 1 in 4 are of working age.[2] Returning to work after a stroke is a major goal  
43  
44 81 for stroke survivors, contributing to social identity, emotional and financial wellbeing,  
45  
46 82 and conferring a sense of purpose and has benefits for the individual, the individual's  
47  
48 83 family and the economy.[3] Despite this, only half of working age stroke survivors  
49  
50 84 make a successful return to meaningful work, and they are two to three times more  
51  
52 85 likely to be unemployed eight years after their stroke than the general population.[1]  
53  
54  
55 86 Although impairments in the stroke survivor's physical, cognitive and communication  
56  
57 87 abilities can affect this,[4, 5] social and environmental factors such as personal and  
58  
59  
60

1  
2  
3 88 employer beliefs and attitudes, job type and organisation size and the benefits  
4  
5 89 system also play an important part.[6, 7]  
6  
7  
8 90

9  
10 91 Vocational rehabilitation (VR) is defined as whatever helps someone with a health  
11  
12 92 problem to return to, or remain in, work and includes both work *and* work-related  
13  
14 93 education.[8] It involves helping people find work, helping those who are in work but  
15  
16 94 having difficulty, as well as supporting career progression in spite of illness or  
17  
18 95 disability. The primary aim is to optimise work participation.[9] Existing research  
19  
20 96 suggests that VR may help stroke survivors return to their previous job or find new  
21  
22 97 work,[10, 11] however trials to date involve small samples in non-UK settings.  
23  
24  
25  
26 98

27  
28 99 RETAKE is a multi-centre individual patient randomised controlled trial (RCT) which  
29  
30 100 aims to determine the clinical and cost-effectiveness of an Early Stroke Specialist  
31  
32 101 Vocational Rehabilitation (ESSVR) intervention in addition to usual NHS  
33  
34 102 rehabilitation on stroke survivors' return to work at 12 months post-randomisation,  
35  
36 103 compared to NHS rehabilitation alone.[12] Acceptability and utility were assessed in  
37  
38 104 a feasibility trial.[13] ESSVR combines conventional occupational therapy (OT) with  
39  
40 105 case coordination and is intended for delivery in the community as often as required  
41  
42 106 by individuals, as determined by a stroke specialist OT with additional VR training.  
43  
44 107 ESSVR includes the following: (a) assessing stroke impact on the person and their  
45  
46 108 job; (b) educating individuals, employers, and families about stroke impact on work,  
47  
48 109 and strategies to lessen impact (e.g. memory aids, fatigue management); (c) work  
49  
50 110 preparation, including opportunities to practice work skills; and (d) liaison with  
51  
52 111 employers to plan and monitor a phased return to work (RTW).  
53  
54  
55  
56  
57  
58  
59  
60

1  
2  
3 113 Failure to implement evidence-based stroke rehabilitation interventions in clinical  
4  
5 114 practice may result in unnecessary suffering and disability.[14, 15] Trialists must  
6  
7 115 consider future implementation in the real world when designing clinical trials, paying  
8  
9 116 particular attention to the context for intervention delivery and factors likely to  
10  
11 117 influence its uptake and use.[16] This is especially true for trials of complex  
12  
13 118 rehabilitation interventions, which comprise multiple interacting components, and  
14  
15 119 target a number of different organisational levels, making them particularly  
16  
17 120 challenging to implement. An embedded process evaluation provides for an in-depth  
18  
19 121 exploration of factors influencing the implementation of complex interventions.  
20  
21  
22  
23  
24 122

25  
26 123 The Medical Research Council (MRC) argue for a systematic approach to designing  
27  
28 124 and conducting process evaluations, drawing on clear descriptions of intervention  
29  
30 125 theory and the identification of key process questions.[17] Mixed-method approaches  
31  
32 126 to process evaluation are increasingly common and consistent with the MRC  
33  
34 127 framework's emphasis on exploring and understanding the important relationship  
35  
36 128 between context, mechanisms and implementation. Theory driven process  
37  
38 129 evaluations are recommended alongside complex intervention trials to measure what  
39  
40 130 is delivered. These measurements include fidelity (whether the intervention was  
41  
42 131 delivered as intended), dose (the quantity of intervention implemented), and "reach"  
43  
44 132 of interventions to understand how the intended audience interacts with the  
45  
46 133 intervention.[17] Alongside a focus on fidelity, in-depth qualitative exploration of  
47  
48 134 participants' experiences of an intervention, and of the social and structural context  
49  
50 135 in which an intervention is provided, are essential elements of process evaluation of  
51  
52 136 complex interventions. This ensures any adaptations made to tailor intervention to  
53  
54 137 the individual and/or differing contexts, which might undermine fidelity can be  
55  
56  
57  
58  
59  
60



1  
2  
3 138 evaluated. Understanding and reporting how the intervention (including training and  
4  
5 139 support, communication and management structures) is delivered is important for  
6  
7  
8 140 replication in clinical practice.[17] Such evaluation aims to reduce the chance of  
9  
10 141 discounting effective interventions (Type II error) or erroneously attributing outcomes  
11  
12 142 to treatment effectiveness, when interventions are not delivered as intended (Type III  
13  
14 143 Errors).[18 - 21] The approach is designed to improve trial design and knowledge  
15  
16  
17 144 translation interventions enhancing clinical implementation and reducing research  
18  
19 145 waste.[22, 23]  
20  
21  
22 146

23  
24 147 This paper reports the protocol for the process evaluation embedded in the RETAKE  
25  
26 148 trial.  
27  
28  
29 149  
30  
31 150  
32  
33

## 34 151 **AIMS AND OBJECTIVES**

### 37 152 **Aims**

38  
39  
40 153 To determine OTs competency to deliver the ESSVR intervention, measure fidelity  
41  
42 154 to the ESSVR intervention and understand the social and structural context in which  
43  
44 155 the intervention is delivered and identify factors which may influence the quality of  
45  
46 156 implementation.  
47  
48  
49  
50 157  
51  
52

### 53 158 **Objectives**

54  
55  
56  
57 159 Fidelity measurement and competency assessment will

58  
59 160 1. Ascertain intervention dose  
60

- 161 2. Describe content of usual care and ESSVR
- 162 3. Describe levels of adherence to the ESSVR intervention
- 163 4. Understand the delivery of Usual Care and ESSVR.
- 164 5. Determine OTs competency to deliver ESSVR
- 165 Social and structural context will include
- 166 6. Describe participating sites.
- 167 7. Understand professionals' experiences of being trained to deliver the intervention.
- 168 8. Understand experiences of delivering the intervention.
- 169 9. Understand the social and structural factors which support the implementation of
- 170 the intervention.
- 171 10. Understand participants' experience of being supported to return to work after
- 172 stroke.
- 173 11. Identify potential contaminants

## 176 **METHODS**

### 177 **Design**

178 Embedded theory-driven mixed-methods process evaluation incorporating qualitative  
179 and quantitative methods. The process evaluation will draw on the intervention logic  
180 model developed by the Trialists (Figure 1) and will be underpinned by Normalisation  
181 Process Theory (NPT), an implementation theory built on four constructs  
182 (coherence, cognitive participation, collective action and reflexive monitoring) each  
183 informed by four components.[24] NPT will be used in the development of data

184 collection tools (interview topic guides and observation checklists) and as a  
 185 sensitising lens in qualitative data analysis and interpretation. NPT constructs will  
 186 underpin the process evaluation and provide insights into the implementation and  
 187 integration of the intervention into participating stroke services. This will include how  
 188 the intervention is received, understood, implemented and how it could be  
 189 normalised into the current healthcare system (see Table 1).

190

191

192 Figure 1. The ESSVR logic model.

193

194 **Table 1: Normalisation Process Theory (Adapted from May et al, 2015)**

| NPT constructs                 | Components                                                                                                                                                           | Explanation                                                                                                                                                                                                                                                                                                                                                                                              |
|--------------------------------|----------------------------------------------------------------------------------------------------------------------------------------------------------------------|----------------------------------------------------------------------------------------------------------------------------------------------------------------------------------------------------------------------------------------------------------------------------------------------------------------------------------------------------------------------------------------------------------|
| <b>Coherence</b>               | <ul style="list-style-type: none"> <li>• Differentiation</li> <li>• Communal specification</li> <li>• Individual specification</li> <li>• Internalisation</li> </ul> | The sense making work that people do individually and collectively when faced with implementing changes to existing working practices. This would include differentiating new practices from existing work and thinking through not only the perceived value and benefits of desired/planned changes but also what work will be required of individual people in a setting to bring about these changes. |
| <b>Cognitive Participation</b> | <ul style="list-style-type: none"> <li>• Initiation</li> <li>• Enrolment</li> <li>• Legitimation</li> <li>• Activation</li> </ul>                                    | The work that people need to do to engage with and commit to a new set of working practices. This often requires bringing together those who believe in and are committed to making changes happen. This also involves people working together to define ways to implement and sustain the new working practices.                                                                                        |

|                                    |                                                                                                                                                                                    |                                                                                                                                                                                                                                                                                                                                                                                                                                                                                                                                                              |
|------------------------------------|------------------------------------------------------------------------------------------------------------------------------------------------------------------------------------|--------------------------------------------------------------------------------------------------------------------------------------------------------------------------------------------------------------------------------------------------------------------------------------------------------------------------------------------------------------------------------------------------------------------------------------------------------------------------------------------------------------------------------------------------------------|
| <p><b>Collective Action</b></p>    | <ul style="list-style-type: none"> <li>• Interactional workability</li> <li>• Relational integration</li> <li>• Skill set workability</li> <li>• Contextual integration</li> </ul> | <p>The work that will be required of people to actually implement changes in practices, including preparation and/or training of staff. Often this entails rethinking how far existing work practices and the division of labour in a setting will have to be changed or adapted to implement the new practices. This requires consideration of not only who will do the work required, but also the skills and knowledge of people who will do the work and the availability of the resources they need to enact and sustain the new working practices.</p> |
| <p><b>Reflexive monitoring</b></p> | <ul style="list-style-type: none"> <li>• Systematisation</li> <li>• Communal appraisal</li> <li>• Individual appraisal</li> <li>• Reconfiguration</li> </ul>                       | <p>Peoples' individual and collective on-going informal and formal appraisal of the usefulness or effectiveness of changes in working practices. This involves considering how the new practices affect the other work required of individuals and groups and whether the intended benefits of the new working practices are evident for the intended recipients and staff.</p>                                                                                                                                                                              |

195

196 In addition, the Conceptual Framework for Implementation Fidelity (CFIF) (Figure 2)  
 197 will guide collection and analysis of quantitative data.[25] The CFIF outlines the  
 198 components and variables that make up and affect intervention fidelity and explains  
 199 how they relate to each other. Adherence includes content and dose (frequency,  
 200 coverage and duration) of the delivery.[25]

201

202 Figure 2. Assessment of fidelity and factors moderating ESSVR delivery in  
 203 accordance with the Conceptual Framework for Implementation Fidelity.[25]

204

205 **Eligibility criteria**

1  
2  
3 206 Stroke survivors that meet the following criteria will be considered eligible to  
4  
5 207 participate in the process evaluation:  
6  
7  
8 208 • Age  $\geq 18$  years.  
9  
10 209 • Admitted to hospital with new stroke (all severities).  
11  
12 210 • In work at stroke onset (including self-employed, paid or voluntary).  
13  
14 211 • Willing and have capacity to provide informed consent to participate in the study.  
15  
16 212 • Have sufficient proficiency in English to contribute to the data collection required  
17  
18 213 for research.

214 Potential participants who do not intend to return to work will be excluded.  
23  
24  
25 215

26  
27  
28 216 Inclusion criteria for carers of potential participants:

- 29  
30 217 • Nominated carer of consenting participant.  
31  
32 218 • Willing and have capacity to provide informed consent to participate in the  
33  
34 219 study.  
35  
36 220 • Have sufficient proficiency in English to contribute to the data collection  
37  
38 221 required for research.  
39  
40  
41  
42 222

## 43 44 45 223 **Informed Consent**

46  
47  
48 224 Potential participants will be provided with an information sheet and be provided the  
49  
50 225 opportunity to ask questions of a researcher prior to consent. Written informed  
51  
52 226 consent will be obtained from all participants. When a participant is randomised to  
53  
54 227 the case study element, a researcher will contact the participant to gain consent for  
55  
56 228 interview and observations. Consent will be reaffirmed at the start of interviews. This  
57  
58 229 process will be the same for carer, employer, OT and NHS staff interviews. For  
59  
60

1  
2  
3 230 employer interviews, additional consent to contact the employer will be requested  
4  
5 231 from the case study participant before the employer is contacted.  
6  
7  
8  
9 232

## 12 233 **Patient and Public Involvement Statement**

14 234 Stroke survivors are involved in all stages of the research cycle.

### 17 235 *Design and development.*

20 236 Two stroke survivors are co-applicants on the grant and assisted in identifying the  
21  
22 237 research questions, designing the study and developing the trial protocol.  
23  
24

### 25 238 *Delivery.*

28 239 Two PPI are members of the Trial Steering Committee, and two are members of the  
29  
30 240 Trial Management Group. Additionally, our RETAKE PPI (Patient & Public  
31  
32 241 Involvement) group, which has six members, meets quarterly. Examples of the work  
33  
34 242 achieved by the PPI group to date are:

- 36 243 • Helping define the primary outcome and defining 'voluntary work' which is  
37  
38 244 included in the definition of the primary outcome.
- 39 245 • Evaluating all patient facing material including aphasia friendly recruitment  
40  
41 246 material.
- 42  
43 247 • Co-development of interview topic guides for trial participants and  
44  
45 248 occupational therapists.
- 46 249 • Overcoming problems with recruitment. For example, resources and  
47  
48 250 narratives to assist recruiters in approaching people with severe stroke.
- 49  
50 251 • Assisting in the design of new materials to promote follow up e.g. including a  
51  
52 252 'patient journey leaflet' and Thankyou cards.
- 53 253 • Helping reduce the length of follow-up questionnaires.
- 54  
55 254 • Advising on communicating with participants during the pandemic.
- 56  
57 255 • Changes to the Excess Treatment Cost payment models during trial, caused  
58  
59 256 problems for the study. One PPI member wrote directly to Directors of the  
60

257 NIHR, NHS England, Health and Social Care and the leads for the NIHR  
 258 Clinical Research Network to explain the impact that these changes on the  
 259 trial. She received a prompt response which was extremely helpful to the  
 260 research team. This has assisted us in explaining the new system to clinical  
 261 colleagues and researchers in the Trusts.

- 262 • Co-Development of a trial website and trial newsletters.

263 The PPI group will also be involved in writing up and presenting study findings.

264

## 265 Data Collection

266 The process evaluation will employ qualitative and quantitative methods to address  
 267 the research questions. Table 2 illustrates the relationship between the process  
 268 evaluation aims, research questions, data sources and data collection methods. The  
 269 following section describes each data source in more detail.

270

271 **Table 2: RETAKE process evaluation research questions and data sources**

272

273

| Aims                                        | Research questions                                     | Data Source(s)                                                                                                 | Method(s)                    |
|---------------------------------------------|--------------------------------------------------------|----------------------------------------------------------------------------------------------------------------|------------------------------|
| <b>Measure fidelity to the intervention</b> | What is the intervention dose, intensity and duration? | <ul style="list-style-type: none"> <li>• Intervention content case report forms (CRFs)</li> </ul>              | Quantitative                 |
|                                             | What is the content of the RETAKE intervention?        | <ul style="list-style-type: none"> <li>• Intervention content CRFs.</li> <li>• NHS therapy records.</li> </ul> | Quantitative and qualitative |
|                                             | What is the content of usual care?                     | <ul style="list-style-type: none"> <li>• Stroke survivor-reported resource use data.</li> </ul>                |                              |

|                                                                                                                                                                                                                                                       |                                                                                                                                                   |                                                                                                                                                                                       |                              |
|-------------------------------------------------------------------------------------------------------------------------------------------------------------------------------------------------------------------------------------------------------|---------------------------------------------------------------------------------------------------------------------------------------------------|---------------------------------------------------------------------------------------------------------------------------------------------------------------------------------------|------------------------------|
|                                                                                                                                                                                                                                                       |                                                                                                                                                   | <ul style="list-style-type: none"> <li>Stroke survivor carer and OT interviews</li> </ul>                                                                                             |                              |
|                                                                                                                                                                                                                                                       | <p>Was the intervention delivered with fidelity?</p> <p>What factors affect implementation fidelity? (context, adherence, moderating factors)</p> | <ul style="list-style-type: none"> <li>Fidelity checklist,</li> <li>Intervention content CRFs</li> <li>Mentoring records,</li> <li>RETAKE OT interviews</li> </ul>                    | Quantitative and qualitative |
| <b>Determine RETAKE OT competency</b>                                                                                                                                                                                                                 | Are the RETAKE OTs competent to deliver the RETAKE intervention?                                                                                  | <ul style="list-style-type: none"> <li>Individual OT performance in assessed vignettes at baseline and 6 months</li> <li>RETAKE OT case records at 12 months post training</li> </ul> | Quantitative                 |
| <b>Understand the social and structural context and identify factors which may influence intervention quality (enablers and barriers, contextual factors associated with variations in outcome across the intervention groups, factors supporting</b> | <p>What is the context for intervention delivery?</p> <p>What are the existing stroke pathways?</p>                                               | <ul style="list-style-type: none"> <li>Site survey at baseline, mid-point and end of intervention delivery</li> </ul>                                                                 | Quantitative and qualitative |
|                                                                                                                                                                                                                                                       | What services are in place for supporting patients in return to work?                                                                             | <ul style="list-style-type: none"> <li>Site survey at baseline, mid-point and end of intervention delivery</li> </ul>                                                                 | Quantitative and qualitative |
|                                                                                                                                                                                                                                                       | What are the staffing levels at the site?                                                                                                         | <ul style="list-style-type: none"> <li>Site survey at baseline, mid-point and end of intervention delivery</li> </ul>                                                                 | Quantitative and qualitative |



|                                                      |                                                                                                         |                                                                                                                                                                                                                                           |                                     |
|------------------------------------------------------|---------------------------------------------------------------------------------------------------------|-------------------------------------------------------------------------------------------------------------------------------------------------------------------------------------------------------------------------------------------|-------------------------------------|
| <p><b>implementation into routine practice).</b></p> | <p>Are there any proposed VR service developments or changes in practice in place/ planned at site?</p> | <ul style="list-style-type: none"> <li>• Site survey at baseline, mid-point and end of intervention delivery</li> <li>• NHS staff interviews</li> </ul>                                                                                   | <p>Quantitative and qualitative</p> |
|                                                      | <p>What are the RETAKE OTs' perceptions of the training and mentoring to deliver the intervention?</p>  | <ul style="list-style-type: none"> <li>• Observations at training sessions</li> <li>• RETAKE OT interviews</li> </ul>                                                                                                                     | <p>Qualitative</p>                  |
|                                                      | <p>How do the RETAKE OTs experience delivering the intervention?</p>                                    | <ul style="list-style-type: none"> <li>• Observations of ESSVR sessions</li> <li>• RETAKE OT interviews</li> <li>• Mentoring records</li> </ul>                                                                                           | <p>Qualitative</p>                  |
|                                                      | <p>What are the social and structural factors supporting intervention implementation?</p>               | <ul style="list-style-type: none"> <li>• Observations of usual care and ESSVR sessions</li> <li>• RETAKE OT interviews</li> <li>• Usual Care therapist interviews</li> <li>• NHS Staff interviews</li> <li>• Mentor interviews</li> </ul> | <p>Qualitative</p>                  |
|                                                      | <p>How do participants' experience being supported to return to work after stroke</p>                   | <ul style="list-style-type: none"> <li>• Stroke survivor interviews</li> <li>• Carer interviews</li> <li>• Employer interviews</li> </ul>                                                                                                 | <p>Qualitative</p>                  |
| <p><b>Identify potential contaminants.</b></p>       | <p>What factors threaten the success of the trial?</p>                                                  | <ul style="list-style-type: none"> <li>• Training delivery</li> <li>• Mentoring records</li> <li>• Site survey at baseline, mid-point and end</li> </ul>                                                                                  | <p>Quantitative and qualitative</p> |

|  |  |                                                                                                                                                                            |  |
|--|--|----------------------------------------------------------------------------------------------------------------------------------------------------------------------------|--|
|  |  | of intervention delivery <ul style="list-style-type: none"> <li>• NHS staff interviews</li> <li>• RETAKE OT interviews</li> <li>• Stroke Participant interviews</li> </ul> |  |
|--|--|----------------------------------------------------------------------------------------------------------------------------------------------------------------------------|--|

274

275 Intervention content Case Report Forms (CRFs)

276 Initial Session CRFs (one per participant) record the Intervention start date and  
277 whether this occurred within 8 weeks of stroke. Participant Summary CRFs record  
278 the number of sessions attended out of those proposed and whether there was an  
279 agreed ending for the OT led return to work support. To ascertain intervention dose  
280 and describe intervention content, data will be extracted from intervention CRFs for  
281 all participants (see Table 3). Therapists record each intervention session against  
282 pre-defined components, on an 'Intervention content CRF'. These data will be used  
283 to identify which components of the intervention were delivered, to what extent  
284 therapists adhered to the intervention process described in the RETAKE manual,  
285 and to what extent participants adhered to the intervention. For case study  
286 participants only, content data will be cross-referenced with the OT's clinical case  
287 notes and additional data extracted to explain how the RETAKE intervention  
288 interacts with usual care and other services such as employment services.

289 Describing usual care

290 To describe the content of the intervention and of usual care, resource use questions  
291 pertaining to participants' use of health and social care services over the previous  
292 three months will be completed by all participants at three, six and twelve months

1  
2  
3 293 post-randomisation as part of follow-up. This data will be used to describe the  
4  
5 294 content of usual care, and in case study participants (n=38) will be triangulated with  
6  
7  
8 295 therapists' clinical notes and participant interview transcripts.  
9

## 10 296 Therapist competency assessment

11  
12  
13  
14 297 Following attendance at a two-day, manualised face-to-face training session with VR  
15  
16 298 expert trainers and again at refresher training six months later, retake OTs  
17  
18 299 competence will be assessed using vignettes depicting novel RTW after stroke  
20  
21 300 scenarios. Model answers developed by the training team will be used to measure  
22  
23 301 competence using criteria based on knowledge of the intervention process (40%),  
24  
25 302 clinical reasoning (50%) and written communication (10%). Scores will be mapped to  
26  
27 303 a rubric identifying OTs as highly competent ( $\geq 70\%$ ), competent (50-69%) or needing  
28  
29 304 additional support ( $\leq 49\%$ ). After 12 months of delivering the intervention RETAKE  
30  
31 305 OTs competence will be reassessed by evaluating the intervention delivered in a  
32  
33 306 random selection of completed intervention case records (one participant per  
34  
35 307 RETAKE OT) against the trainer's expert opinion.  
36  
37  
38  
39  
40

41 308

## 42 43 44 45 309 Fidelity

46  
47  
48 310 To assess implementation fidelity a range of data collection methods informed by the  
49  
50 311 CFIF will be used (see Table 3).[25]  
51  
52

## 53 54 312 Fidelity Checklist

55  
56  
57 313 A fidelity checklist based on the RETAKE intervention logic model (see Figure 1) and  
58  
59 314 RETAKE intervention process and components will be applied to complete case  
60

315 records (Content of Intervention CRFs, RETAKE OT case notes and Initial Session  
 316 CRFs) from a random selection of stroke participants randomised to receive the  
 317 RETAKE intervention (one per treating RETAKE OT). This will be used in measuring  
 318 adherence to the RETAKE process and identifying factors affecting adherence.

319

320 **Table 3. CFIF led data extraction for Fidelity Assessment:**

321

| <b>Fidelity Measure</b>                                         | <b>CFIF Construct*</b>                  | <b>Measurement tool</b>                                                                | <b>Data for extraction</b>                                                                                                                            | <b>Time point</b>                                                                                                     |
|-----------------------------------------------------------------|-----------------------------------------|----------------------------------------------------------------------------------------|-------------------------------------------------------------------------------------------------------------------------------------------------------|-----------------------------------------------------------------------------------------------------------------------|
| Frequency<br>Duration                                           | <b>Adherence and moderating factors</b> | <b>Initial Session Case Report Forms (CRFs)</b><br><br><b>Participant Summary CRFs</b> | Intervention start date and end date<br>Number of proposed and attended sessions<br>Whether there was an agreed ending for OT return to work support. | One CRF per participant at Initial session.<br><br>One CRF per participant completed throughout intervention delivery |
| Intensity (time spent per session)<br>Dose (number of sessions) | <b>Adherence</b>                        | <b>Intervention content CRF</b><br><br><b>OT clinical records (RETAKE+ Usual Care)</b> | Time spent (in minutes) on VR activities per session<br><br>Description of intervention delivered in each session                                     | One completed following every intervention session<br><br>In case study participants.                                 |
| Therapist adherence<br>Factors affecting adherence              | <b>Adherence and moderating factors</b> | <b>Fidelity Checklist</b>                                                              | Components delivered, factors affecting delivery<br>RETAKE process followed Y/N                                                                       | Applied to one randomly selected completed case per RETAKE OT                                                         |

|                                                                                     |                                         |                                                                             |                                                                                                         |                                                                                   |
|-------------------------------------------------------------------------------------|-----------------------------------------|-----------------------------------------------------------------------------|---------------------------------------------------------------------------------------------------------|-----------------------------------------------------------------------------------|
| Real time therapist adherence<br>Factors affecting adherence                        | <b>Adherence and moderating factors</b> | <b>Mentoring CRFs</b>                                                       | Mentor's concerns about adherence<br>Factors affecting intervention delivery<br><br>Potential solutions | Completed monthly by mentors                                                      |
| Barriers and enablers to intervention delivery                                      | <b>Moderating factors</b>               | <b>Interviews with RETAKE Therapists</b>                                    | Factors affecting intervention delivery<br><br>Potential solutions (developed by OT)                    | In a random selection of cases during intervention delivery at 3, 6 and 12 months |
| Acceptability of the intervention<br>Barriers and enablers to intervention delivery | <b>Moderating factors</b>               | <b>Interviews with stroke participants, carers, employers and NHS staff</b> | Acceptability of intervention<br>Factors affecting delivery<br>Potential solutions to barriers          | Throughout intervention delivery in case studies                                  |

322 Key; \*CFIF Adherence includes intervention content, dose, coverage, frequency and  
 323 duration of intervention; CFIF Moderating factors includes participant  
 324 responsiveness, intervention complexity, strategies to facilitate implementation,  
 325 quality of delivery, recruitment, and context.

327 Mentor interviews and records

328 *Mentoring records*

329 Following training, each treating OT will be assigned a mentor with extensive  
 330 knowledge and experience of vocational rehabilitation. Mentoring will take place  
 331 monthly via teleconference in small groups (four to six therapists) and serve as an  
 332 intervention implementation support mechanism. RETAKE OTs will be able to

1  
2  
3 333 discuss any difficulties they are experiencing, ask questions and share best practice  
4  
5 334 with other OTs and their mentor. This process will also facilitate communication  
6  
7 335 between the trial team and enable barriers to implementation and contamination  
8  
9 336 risks to be reported. Key discussion points will be recorded by mentors using a  
10  
11 337 mentoring record form for each session. These records, along with all email  
12  
13 338 correspondence between mentor and mentees will be collected for qualitative  
14  
15 339 content analysis.

#### 20 340 *Mentor Interviews*

21  
22  
23 341 Semi-structured interviews will be conducted by two research assistants (SC and  
24  
25 342 KC) with all mentors (n=6) to explore their experiences of supporting RETAKE OTs  
26  
27 343 to deliver the intervention, and ascertain their views of organisational, social and  
28  
29 344 other factors contributing to or affecting delivery of the intervention.

#### 35 346 Social and structural context

#### 39 347 *Site survey*

40  
41 348 To describe participating sites and identify potential contaminants, sites will be asked  
42  
43 349 to complete a questionnaire by telephone at three time points; prior to recruitment,  
44  
45 350 halfway through, and at the end of the intervention period. This will contribute to  
46  
47 351 understanding contextual influences through capturing data on existing stroke care  
48  
49 352 pathways and resources (including staff and services) available for supporting  
50  
51 353 participants in a return to work. It will also identify potential contamination risks  
52  
53 354 associated with proposed or planned VR service developments or changes in  
54  
55 355 practice that may influence trial outcomes.  
56  
57  
58  
59  
60

1  
2  
3 357 Therapist training  
4  
5

6 358 *Non-participant observations*  
7  
8

9 359 To understand OT's experiences of being trained to deliver the intervention, a  
10  
11 360 research assistant (RC) will observe up to four training sessions delivered by the  
12  
13 361 training team. A checklist will be developed using NPT constructs to guide  
14  
15 362 observations. Non-participant observations aim to identify; whether therapists  
16  
17 363 understand the intervention and their role in implementation, whether they think the  
18  
19 364 RETAKE intervention can be integrated into existing practice and any contextual  
20  
21 365 factors affecting the trial.  
22  
23  
24

25 366  
26

27 367 To describe adherence to the intervention, a researcher will observe up to three  
28  
29 368 sessions for each case study participant in the intervention and usual care arms of  
30  
31 369 the trial. Non-participant observations will be conducted using prompts for structured  
32  
33 370 observation and unstructured field notes.[26] Participant selection for inclusion the  
34  
35 371 case study element is described below.  
36  
37  
38

39  
40 372  
41  
42

43 373 Interviews with Occupational Therapists  
44

45  
46 374 Semi-structured interviews will be conducted by a research assistant (RC) with a  
47  
48 375 minimum of one OT per site following their initial RETAKE training to explore their  
49  
50 376 experience of training, the mentoring process and their confidence in intervention  
51  
52 377 delivery. OT's views of the intervention, barriers and facilitators to implementation,  
53  
54 378 and any organisational or social factors impacting on delivery will also be explored.  
55  
56 379 Interviews will take place following training and be repeated at two additional time-  
57  
58  
59  
60

1  
2  
3 380 points: mid-way through the RETAKE intervention delivery and at the end of the  
4  
5 381 study.

6  
7  
8 382

9  
10 383 *Case studies*

11  
12 384 Longitudinal case studies will be used to map the care received by RETAKE and  
13  
14 385 usual care participants to develop a more detailed understanding of participants'  
15  
16 386 (stroke survivors, carers, employers) and RETAKE OTs experiences of support for  
17  
18 387 RTW. A 5% subset of participants from both arms of the trial (total n=38) will be  
19  
20 388 randomly selected and invited to participate in the case study element of the process  
21  
22 389 evaluation.

23  
24  
25  
26 390

27  
28  
29 391 i) Case study interviews

30  
31  
32 392 Semi-structured interviews will be conducted by two research assistants (SC and  
33  
34 393 KC) with case study participants at three time points: three, six, and twelve months  
35  
36 394 post-randomisation, about their experiences and views of and adherence to the  
37  
38 395 RETAKE intervention and the support they received to return to work. The case  
39  
40 396 study participants' carers (if nominated), their employers (where participant consent  
41  
42 397 is obtained) and the OTs providing support for RTW will be interviewed.

43  
44  
45  
46  
47 398 NHS staff interviews

48  
49  
50 399 To further understand the social and structural factors which influence the  
51  
52 400 implementation of the intervention, interviews will be conducted with up to two (n=34  
53  
54 401 in total) NHS staff involved in the management, commissioning or delivery of stroke  
55  
56 402 rehabilitation within each trial site. Participating staff will be chosen using a mixture  
57  
58 403 of purposive and snowball sampling. This will be based on a full range of trial sites,  
59  
60



404 staff knowledgeable about the implementation of the intervention at their site, and  
 405 staff knowledgeable about the decision-making process relating to wider roll-out.

406

407 **Additional participant interviews**

408 An additional random 5% of study participants will be invited to participate in semi-  
 409 structured interviews at the end of the intervention period. These interviews will  
 410 explore participants' experience of the intervention as well as their perceptions and  
 411 experiences of returning to work.

412

413 All qualitative interviews will be conducted using a topic guide informed by NPT.

414 Examples of question topics and how they relate to the four NPT constructs are  
 415 shown in Table 4. Topic guides will be presented to the RETAKE Public and Patient  
 416 Involvement (PPI) group for comment prior to use. All interviews will be audio  
 417 recorded and transcribed in full.

418

419 **Table 4: Examples of question topics related to NPT constructs**

| <b>Normalisation Process Theory Constructs</b> | <b>NHS Staff/ therapist interview topics</b><br>(some may also arise in informal feedback during training observations)                               | <b>Stroke Participant interview topics</b> (some may also arise in intervention / usual care observations) | <b>Employer interview topics</b>                                           |
|------------------------------------------------|-------------------------------------------------------------------------------------------------------------------------------------------------------|------------------------------------------------------------------------------------------------------------|----------------------------------------------------------------------------|
| <b>Coherence</b>                               | How do staff describe the intervention?<br><br>How is the intervention similar to/different from usual care?<br><br>Who would (most) benefit from the | RTW support received: similarities/differences between control and intervention participants               | Experience of liaising with the therapist and/or participant on RTW issues |

|                                |                                                                                                                                                                                                                                                                                                                                       |                                                                                                                                                                                                                                                                                                                                                                                                             |                                                                                                                                                                  |
|--------------------------------|---------------------------------------------------------------------------------------------------------------------------------------------------------------------------------------------------------------------------------------------------------------------------------------------------------------------------------------|-------------------------------------------------------------------------------------------------------------------------------------------------------------------------------------------------------------------------------------------------------------------------------------------------------------------------------------------------------------------------------------------------------------|------------------------------------------------------------------------------------------------------------------------------------------------------------------|
|                                | intervention?                                                                                                                                                                                                                                                                                                                         |                                                                                                                                                                                                                                                                                                                                                                                                             |                                                                                                                                                                  |
| <b>Cognitive participation</b> | <p>Do staff see value/potential in the intervention?</p> <p>Have they found the training and experience a worthwhile investment of time?</p> <p>Do they feel they have the competence/resources to deliver the intervention effectively?</p>                                                                                          | <p>What were their expectations? Did patients (&amp; carers) value the intervention?</p> <p>How did they respond to the therapists' suggestions?</p> <p>Did they feel they had the ability/resources/confidence to progress through the sessions and ultimately RTW?</p> <p>Context in which participant received RETAKE/acted on suggestions: social, financial, health state, access to opportunities</p> | <p>Expectations of the processes: liaising with therapist/patient and patient's RTW</p> <p>(Prior) experience in supporting RTW for people with disabilities</p> |
| <b>Collective action</b>       | <p>How compatible is the intervention with the existing stroke care pathway?</p> <p>What other RTW services/resources exist locally? How does this intervention compare/complement those services? Describe working relationships with those services.</p> <p>Support from managers and colleagues during the intervention period</p> | <p>How did participants accommodate the intervention sessions/follow up actions?</p> <p>How did they manage/are they managing their RTW (if applicable)?</p> <p>Financial implications</p>                                                                                                                                                                                                                  | <p>Views on who is responsible /roles in supporting RTW</p> <p>Financial implications e.g. modifications</p>                                                     |
| <b>Reflexive monitoring</b>    | <p>Perceived effects on patients (&amp; carers)</p> <p>Views on time/resources invested in delivery vs impact</p> <p>What is needed to</p>                                                                                                                                                                                            | <p>Perceived effects of RETAKE/other RTW support</p> <p>Views on time/resources invested in participation vs impact</p> <p>What was good about</p>                                                                                                                                                                                                                                                          | <p>Perceptions of benefit to employer/tutor/advisor</p> <p>Perceptions of benefit to employee</p> <p>What was helpful about discussions</p>                      |

|  |                                                                                                                                         |                                                                                                                       |                                                                                                           |
|--|-----------------------------------------------------------------------------------------------------------------------------------------|-----------------------------------------------------------------------------------------------------------------------|-----------------------------------------------------------------------------------------------------------|
|  | make it possible to roll out the intervention effectively? (changes to intervention; changes in services/resources needed for delivery) | RETAKE and what could be improved? (content of intervention sessions/work plans, timing, relationship with therapist) | with therapist/participant?<br><br>What further information/support would they have liked – at what time? |
|--|-----------------------------------------------------------------------------------------------------------------------------------------|-----------------------------------------------------------------------------------------------------------------------|-----------------------------------------------------------------------------------------------------------|

420

## 421 Data Analysis

### 422 Quantitative analysis

423 The dose, duration and frequency of the ESSVR intervention will be calculated using  
 424 data from completed CRFs in combination with NHS therapy records. The total time  
 425 spent delivering the ESSVR intervention (face to face and non-face to face contact  
 426 (liaison with the patient, employer and other stakeholders by letter/phone),  
 427 administration and travel) will be identified. Details relating to the content of  
 428 intervention sessions will be extracted to identify whether core components of  
 429 ESSVR were delivered as intended (i.e. as specified in the intervention manual and  
 430 logic model). Associations between therapist attributes, contextual factors and  
 431 intervention fidelity (measured by deviations from the RETAKE core process) will be  
 432 explored using regression models. Analysis will be conducted using Statistical  
 433 Package for the Social Sciences (SPSS) (version 21.0 for Windows). In addition, a  
 434 fidelity monitoring checklist will be used to check whether the ESSVR process is  
 435 followed.

436

### 437 Describing Usual Care

438 Data regarding rehabilitation delivered in Usual Care will be extracted from resource  
 439 use data in the follow-up questionnaires and from NHS Therapy records in case

1  
2  
3 440 study participants randomised to Usual Care. These data will be used to inform the  
4  
5 441 cost of Usual Care for the economic evaluation and describe and understand usual  
6  
7 442 care provided during stroke rehabilitation in inpatient and community services.

8  
9  
10 443 Quantitative data analysis will be conducted using Statistical Package for the Social  
11  
12 444 Sciences (SPSS; Version 21.0 for Windows). Analysis of usual care data obtained  
13  
14 445 from NHS Therapy records is described below.  
15  
16

17 446

18  
19  
20 447 Qualitative analysis

21  
22  
23 448 Inductive (thematic analysis) and deductive (informed by NPT) approaches will be  
24  
25 449 used guide data analysis and interpretation. Observational and Interview data will be  
26  
27 450 transcribed verbatim and uploaded into QSR NVivo software for management.

28  
29  
30 451 Descriptions of usual care in NHS Therapy records, observational field note data,  
31  
32 452 including researcher reflections and interview data will be analysed thematically.[26]

33  
34 453 Framework analysis will be used with the case study data to facilitate within and  
35  
36 454 between case analyses. Analysis of each data set will be conducted independently  
37  
38 455 and then jointly by at least two study team members (SC, KC, KP) to corroborate  
39  
40 456 themes and discuss any discrepancies. It will follow a standard approach of data  
41  
42 457 familiarisation, line-by-line coding, development and refinement of broader  
43  
44 458 conceptual explanatory categories and iterative testing of interpretation through  
45  
46 459 participant feedback and discussions within the research team. Analysis will proceed  
47  
48 460 iteratively with data collection to determine whether data saturation has been  
49  
50 461 achieved; researchers will draw on the RETAKE logic model (Figure 1). Throughout  
51  
52 462 the qualitative analysis, NPT will be used as a sensitising framework. Researchers  
53  
54 463 will keep a set of interim summary notes documenting any reflexivity points and  
55  
56  
57  
58  
59  
60

1  
2  
3 464 connections between the data with NPT and the logic model, to aid analytical  
4  
5 465 discussions with the wider process evaluation team.  
6  
7  
8 466

9  
10  
11 467 **DISCUSSION**  
12

13  
14 468 Process evaluations are increasingly embedded in trials of complex  
15  
16 469 interventions,[16] but published process evaluations of complex stroke rehabilitation  
17  
18 470 trials are still relatively few in number.[29-36] At present, despite the publication of  
19  
20 471 the MRC guidelines for process evaluation,[17] there is limited consensus on how  
21  
22 472 best to conduct these important studies, particularly in relation to complex  
23  
24 473 interventions such as RETAKE, which cross the boundary between health and  
25  
26 474 employment services.  
27  
28  
29

30 475 Balancing the need to gain greater understanding of contextual factors that may  
31  
32 476 affect trial outcomes with the realities of collecting more data than is necessary to  
33  
34 477 describe the facilitators and barriers to implementation is a challenge for  
35  
36 478 researchers.[23] However, adopting a robust theoretical framework to underpin the  
37  
38 479 process evaluation, pre-determining objectives that steer the data collection and  
39  
40 480 drawing on previous research mitigates this challenge.[29, 31, 34, 36] Using a  
41  
42 481 mixed-methods approach and generating quantitative data to measure fidelity and  
43  
44 482 adherence to the intervention protocol alongside site specific data and in-depth  
45  
46 483 qualitative data from a wide range of participants will ensure a focused but  
47  
48 484 comprehensive data set to support analysis of the trial outcomes.  
49  
50  
51  
52

53 485

54  
55 486 The MRC guidelines identify that different approaches to managing process  
56  
57 487 evaluations are used.[17] In this study the process evaluation is led by a researcher  
58  
59  
60

1  
2  
3 488 who is independent of the trial team. However, data will be collected and analysed  
4  
5 489 by researchers who are also contributing to the trial data collection. The  
6  
7 490 development of topic guides and interview schedules with the support of the process  
8  
9 491 evaluation lead has been outlined above. In respect of the qualitative analysis the  
10  
11 492 use of independent and then joint coding and development of themes, followed by  
12  
13 493 review of emerging findings by the wider research team is designed to enhance the  
14  
15 494 transparency and trustworthiness of the analytical process. Research reflexivity is  
16  
17 495 encouraged and recorded in memo form and discussed by the wider research team  
18  
19 496 in process evaluation review meetings every two months.  
20  
21  
22  
23  
24  
25

26 498 Rehabilitation interventions are frequently tailored to the participant and modified to  
27  
28 499 suit the local context and resources. It is therefore important to monitor intervention  
29  
30 500 delivery to ensure fidelity is maintained and any moderating factors are identified and  
31  
32 501 addressed in real time to ensure robust trial outcomes. A unique feature of this trial is  
33  
34 502 the use of mentoring for individual RETAKE OTs throughout intervention delivery in  
35  
36 503 this study. Monitoring this process will enable any intervention modifications to be  
37  
38 504 identified and documented in detail. Using NPT's constructs will help to identify  
39  
40 505 vulnerable features of the implementation process with respect to the work involved  
41  
42 506 in introducing and embedding the RETAKE intervention and the importance and  
43  
44 507 influence of contextual factors on trial outcomes.  
45  
46  
47  
48

49 508  
50  
51 509 Investigating the implementation fidelity of a complex intervention offers insight into  
52  
53 510 barriers and facilitators to delivery to inform future study design. It also yields  
54  
55 511 valuable information regarding the 'core components' and 'active ingredients' of an  
56  
57 512 intervention and any permitted modifications for clinical implementation.[37]  
58  
59  
60

1  
2  
3 513 Understanding of the causal mechanisms of complex interventions is vital in being  
4  
5 514 able to deliver an effective intervention in other settings. This process evaluation will  
6  
7  
8 515 measure these modifications and their effect on the intervention's fidelity while  
9  
10 516 providing the context in which to interpret the variation in outcomes on the  
11  
12 517 effectiveness of the trial.  
13

14 518

### 17 519 **Ethics and dissemination**

18  
19 520 Ethics approval has been obtained through the East Midlands – Nottingham 2  
20  
21 521 Research Ethics Committee (REC) (Ref: 18/EM/0019) and the NHS Health  
22  
23 522 Research Authority.  
24  
25

26 523

### 29 524 **Availability of data and materials**

30  
31 525 No additional data will be made available.  
32  
33

34 526

### 36 527 **Competing interests**

37  
38 528 The authors declare that they have no competing interests.  
39  
40

41 529

### 43 530 **Funding**

44  
45 531 This study is funded by the NIHR HTA programme (ref: 15/130/11). The views  
46  
47 532 expressed herein are those of the authors, not necessarily the NIHR, the Department  
48  
49 533 of Health and Social Care, or the NHS.  
50

51 534

### 55 535 **Authors' contributions**

56  
57 536 KR, CM, AFa, AB, ROC, MW, and CW conceived the study. KR, DJC, and CM  
58  
59 537 designed the process evaluation. KR, CM, DJC, SC, KC, JH, JP and KP  
60

1  
2  
3 538 operationalized the process evaluation protocol. KR, JP, and JH designed the  
4  
5 539 intervention. AS has the role of trial sponsor. IH, RB, and AFa devised the data  
6  
7 540 management and statistical analysis plan. JS and JM acted as PPI collaborators to  
8  
9 541 support plans for trial design/delivery, management, and dissemination of trial  
10  
11 542 findings. VM and SH have responsibility for management of the trial. KR, SC and  
12  
13 543 DJC drafted the manuscript; all other authors read and approved the final version.  
14  
15  
16  
17 544

### 19 545 **Authors' information**

21 546 <sup>1</sup>Associate Professor of Rehabilitation Research, Division of Rehabilitation, Ageing  
22  
23 547 and Wellbeing, School of Medicine, B-Floor, Medical School Queen's Medical  
24  
25 548 Centre, Nottingham NG7 2UH.

28 549 <sup>2</sup>Clinical Trials Research Unit (CTRU), Leeds Institute of Clinical Trials Research,  
29  
30 550 Level 11 Worsley Building, University of Leeds, Leeds LS2 9JT.

33 551 <sup>3</sup>Health Economics Group, Room 2.37, Norwich Medical School, University of East  
34  
35 552 Anglia, Norwich Research Park, Norwich NR4 7TJ. <sup>4</sup>Lancashire Clinical Trials Unit,

37 553 Lancashire Applied health Research Collaboration Hub, Brook Building, Room 429,  
38  
39 554 University of Central Lancashire, Preston PR1 2HE. <sup>5</sup> Academic Department of

42 555 Rehabilitation Medicine, Leeds Institute of Molecular Medicine, University of Leeds,  
43  
44 556 Level D, Martin Wing, Leeds General Infirmary, Leeds LS1 3EX. <sup>6</sup>Patient and Public

47 557 Involvement Collaborator, Hampshire, UK. <sup>7</sup>Different Strokes, Raphael House, Ilford,  
48  
49 558 London IG1 1YT. <sup>8</sup>Geoffrey Jefferson Brain Research Centre, The Manchester

51 559 Academic Health Science Centre, Northern Care Alliance & University of  
52  
53 560 Manchester, Manchester M13 9PL. <sup>9</sup>Department of Population Health Sciences,

56 561 Faculty of Life Sciences & Medicine, King's College London, 5<sup>th</sup> Floor Addison  
57  
58  
59  
60



1  
2  
3 562 House, Guy's Campus, London SE1 1UL. <sup>10</sup>Research and Innovation, Jubilee

4  
5 563 Conference Centre, Jubilee Campus, Wollaton Road, Nottingham NG8 1BB.

6  
7  
8 564 <sup>11</sup>Visiting Associate Professor in Stroke Care Academic Unit for Ageing and Stroke

9  
10 565 Research, Leeds Institute of Health Sciences

11  
12 566 University of Leeds, Leeds LS2 9JT, UK.

13  
14  
15 567

16  
17 568

18  
19 569

20  
21 570

22  
23 571

24  
25 572

26  
27 573

28  
29 574

30  
31 575

32  
33 576

34  
35 577

36  
37 578

38  
39 579

40  
41  
42  
43  
44  
45 580 **REFERENCES**

46  
47 581

48  
49 582 1. Stroke Association. State of the Nation: stroke statistics. Stroke

50  
51 583 Association. 2018. <https://www.stroke.org.uk/resources/state-nation-stroke->

52  
53 584 statistics (accessed 27 Apr 2021).

54  
55 585 2. Daniel K, Wolfe CD, Busch MA, et al. What are the social consequences of

56  
57 586 stroke for working-aged adults? A systematic review. *Stroke* 2009;40:e431-40.

- 1  
2  
3 587 3. Sinclair E, Radford K, Grant M, et al. Developing stroke-specific vocational  
4  
5 588 rehabilitation: a soft systems analysis of current service  
6  
7 589 provision. *Disabil Rehabil*2014;36:409-17.
- 8  
9  
10 590 4. Corr S, Wilmer S. Returning to work after a stroke: an important but neglected  
11  
12 591 area. *Br J Occup Ther*2003;66:186-92.
- 13  
14 592 5. Frank AO, Thurgood J. Vocational rehabilitation in the UK: opportunities for  
15  
16 593 health-care professionals. *Int J Ther Rehabil*2006;13:126-34.
- 17  
18 594 6. Lindström B, Röding J, Sundelin G. Positive attitudes and preserved high level of  
19  
20 595 motor performance are important factors for return to work in younger persons  
21  
22 596 after stroke: a national survey. *J Rehabil Med*2009;41:714-8.
- 23  
24 597 7. Palstam A, Westerlind E, Persson HC, et al. (2019). Work-related predictors for  
25  
26 598 return to work after stroke. *Acta Neurol Scand*2019;139:382-388.  
27  
28 599 doi:10.1111/ane.13067
- 29  
30  
31 600 8. Waddell G, Burton AK, Kendall NA. Vocational rehabilitation—what works, for  
32  
33 601 whom, and when? (Report for the Vocational Rehabilitation Task Group).  
34  
35 602 London: TSO 2008.
- 36  
37  
38 603 9. Escorpizo R, Reneman MF, Ekholm J, et al. A conceptual definition of vocational  
39  
40 604 rehabilitation based on the ICF: building a shared global  
41  
42 605 model. *J Occup Rehabil* 2011;21:126-33.
- 43  
44  
45 606 10. Ntsiea MV, Van Aswegen H, Lord S, et al. The effect of a workplace intervention  
46  
47 607 programme on return to work after stroke: a randomised controlled  
48  
49 608 trial. *Clin Rehabil*2015;29:663-73.
- 50  
51  
52 609 11. Trexler LE, Trexler LC, Malec JF, et al. Prospective randomized controlled trial of  
53  
54 610 resource facilitation on community participation and vocational outcome following  
55  
56 611 brain injury. *J Head Trauma Rehabil*2010;25:440-6.
- 57  
58  
59  
60

- 1  
2  
3 612 12. Radford K, King K, McLellan V, et al. An individually randomised controlled multi-  
4  
5 613 centre pragmatic trial with embedded economic and process evaluations of early  
6  
7 614 vocational rehabilitation compared with usual care for stroke survivors: study  
8  
9 615 protocol for the RETurn to work After stroKE (RETAKE) trial. Submitted to  
10  
11 616 Trials 2020.
- 12  
13  
14 617 13. Grant M. *Developing, delivering and evaluating stroke specific vocational*  
15  
16 618 *rehabilitation: A feasibility randomised controlled trial (Doctoral dissertation,*  
17  
18 619 *University of Nottingham)*. 2016.
- 20  
21 620 14. Lynch EA, Chesworth BM, Connell LA. Implementation—The missing link in the  
22  
23 621 research translation pipeline: is it any wonder no one ever implements evidence-  
24  
25 622 based practice?. *Neurorehabil Neural Repair*2018;32:751-61.
- 26  
27  
28 623 15. Glasziou P, Straus S, Brownlee S, et al. Evidence for underuse of effective  
29  
30 624 medical services around the world. *Lancet*2017;390:169-177. doi:10.1016/S0140-  
31  
32 625 6736(16)30946-1
- 33  
34  
35 626 16. Walker MF, Hoffmann TC, Brady MC, et al. Improving the development,  
36  
37 627 monitoring and reporting of stroke rehabilitation research: Consensus-based core  
38  
39 628 recommendations from the Stroke Recovery and Rehabilitation Roundtable. *Int J*  
40  
41 629 *Stroke*2017;12:472-9.
- 42  
43  
44 630 17. Moore GF, Audrey S, Barker M, et al. Process evaluation of complex  
45  
46 631 interventions: Medical Research Council guidance. *BMJ*2015;350:h1258.
- 47  
48  
49 632 18. Basch CE, Sliepcevich EM, Gold RS, et al. Avoiding type III errors in health  
50  
51 633 education program evaluations: a case study. *Health Educ Q*1985;12:315-31.
- 52  
53  
54 634 19. Dusenbury L, Brannigan R, Falco M, et al. A review of research on fidelity of  
55  
56 635 implementation: implications for drug abuse prevention in school  
57  
58 636 settings. *Health Educ Res*2003;18:237-56.
- 59  
60

- 1  
2  
3 637 20. Colditz GA, Emmons KM. The promise and challenges of dissemination and  
4  
5 638 implementation research. *Dissemination and implementation research in health:*  
6  
7 *Translating science to practice*2012;24:3-22.  
8 639  
9  
10 640 21. Bosch M, VanDerWeijden T, Wensing M, et al. Tailoring quality improvement  
11  
12 641 interventions to identified barriers: a multiple case analysis. *J Eval Clin*  
13  
14 642 *Pract*2007;13:161-8.  
15  
16  
17 643 22. Levac D, Glegg SM, Sveistrup H, et al. A knowledge translation intervention to  
18  
19 644 enhance clinical application of a virtual reality system in stroke  
20  
21 645 rehabilitation. *BMC Health Serv Res*2016;16:557.  
22  
23  
24 646 23. Ioannidis JP, Greenland S, Hlatky MA, et al. Increasing value and reducing waste  
25  
26 647 in research design, conduct, and analysis. *Lancet*2014;383:166-75.  
27  
28  
29 648 24. May C, Murray E, Finch T, et al. Normalization process theory online users'  
30  
31 649 manual and toolkit. NPT: Normalization Process Theory.  
32  
33 650 2010. <http://www.normalizationprocess.org/> (accessed 27 Apr 2021).  
34  
35  
36 651 25. Carroll C, Patterson, M, Wood, S, et al. A conceptual framework for  
37  
38 652 implementation fidelity. *Implementation Sci*2007;2:40.  
39  
40 653 26. Ciesielska M, Boström KW, Öhlander M. Observational methods. In: Ciesielska  
41  
42 654 M, ed. *Qualitative Methodologies in Organization Studies Volume II: Methods and*  
43  
44 655 *Possibilities*. Cham, Switzerland. Springer 2018:33-52.  
45  
46  
47 656 27. Braun V, Clarke V. Using thematic analysis in psychology. *Qual*  
48  
49 657 *Res Psychol* 2006;3:77-101.  
50  
51  
52 658 28. Hoffmann TC, Glasziou PP, Boutron I, et al. Better reporting of interventions:  
53  
54 659 template for intervention description and replication (TIDieR) checklist and  
55  
56 660 guide. *BMJ* 2014;348:g1687.  
57  
58  
59  
60

- 1  
2  
3 661 29. Masterson-Algar P, Burton CR, Brady MC, et al. The PD COMM trial: a protocol  
4  
5 662 for the process evaluation of a randomised trial assessing the effectiveness of  
6  
7 663 two types of SLT for people with Parkinson's disease. *Trials*2017;18:397.  
8  
9  
10 664 30. Clarke DJ, Godfrey M, Hawkins R, et al. Implementing a training intervention to  
11  
12 665 support caregivers after stroke: a process evaluation examining the initiation and  
13  
14 666 embedding of programme change. *Implementation*  
15  
16 667 *Sci*2013;8:96 doi:10.1186/1748-5908-8-96  
17  
18  
19 668 31. Clarke DJ, Hawkins R, Sadler E, et al. Introducing structured caregiver training in  
20  
21 669 stroke care: findings from the TRACS process evaluation study. *BMJ*  
22  
23 670 *Open*2014;4:e004473 doi:10.1136/bmjopen-2013-004473  
24  
25  
26 671 32. Luker JA, Craig LE, Bennett L, et al. Implementing a complex rehabilitation  
27  
28 672 intervention in a stroke trial: a qualitative process evaluation of AVERT. *BMC Med*  
29  
30 673 *Res Methodol* 2016; 52 doi:10.1186/s12874-016-0156-9  
31  
32  
33 674 33. Liu H, Lindley R, Alim M, et al. Protocol for process evaluation of a randomised  
34  
35 675 controlled trial of family-led rehabilitation post stroke (ATTEND) in India. *BMJ*  
36  
37 676 *Open*2016;6:e012027 doi:10.1136/ bmjopen-2016-012027  
38  
39  
40 677 34. Liu H, Lindley R, Alim M, et al. Family-led rehabilitation in India (ATTEND)—  
41  
42 678 Findings from the process evaluation of a randomized controlled trial. *Int J*  
43  
44 679 *Stroke*2019;53–60 doi:10.1177/1747493018790076  
45  
46  
47 680 35. Salbach NM, Wood-Dauphinee S, Desrosiers J, et al. Facilitated  
48  
49 681 interprofessional implementation of a physical rehabilitation guideline for stroke in  
50  
51 682 inpatient settings: process evaluation of a cluster randomized  
52  
53 683 trial. *Implementation Sci* 2017;100 doi:10.1186/s13012-017-0631-7  
54  
55  
56  
57  
58  
59  
60

- 1  
2  
3 684 36. Radford K, Sutton C, Sach T, et al. FRESH – Facilitating Return to work through  
4  
5 685 Early Specialist Health-based interventions: feasibility randomised controlled  
6  
7 686 trial. *Health Technology Assessment*2018;22 doi:10.3310/hta22330  
8  
9  
10 687 37. Hart T, Whyte J, Dijkers M, et al. Manual of Rehabilitation Treatment  
11  
12 688 Specification. <http://mrrri.org/innovations/manual-for-rehabilitation-treatment->  
13  
14 689 [specification](http://mrrri.org/innovations/manual-for-rehabilitation-treatment-) (accessed 27 Apr 2021).  
15  
16  
17  
18  
19  
20  
21  
22  
23  
24  
25  
26  
27  
28  
29  
30  
31  
32  
33  
34  
35  
36  
37  
38  
39  
40  
41  
42  
43  
44  
45  
46  
47  
48  
49  
50  
51  
52  
53  
54  
55  
56  
57  
58  
59  
60

For peer review only

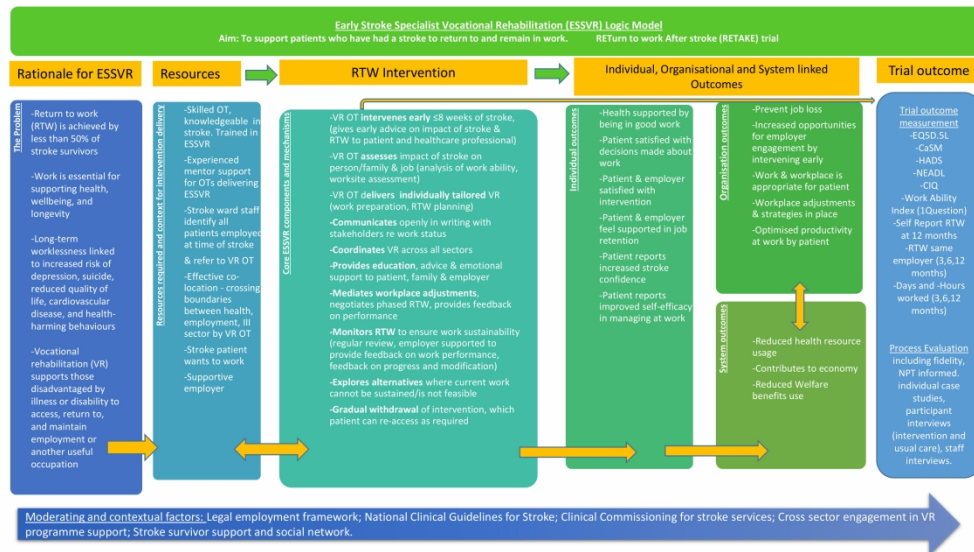

Figure 1. The ESSVR logic model.

338x190mm (300 x 300 DPI)

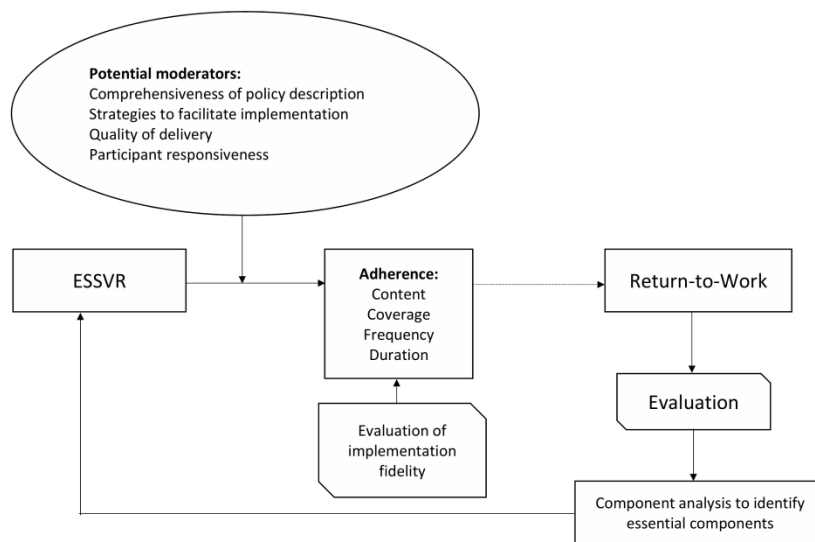

Figure 2. Assessment of fidelity and factors moderating ESSVR delivery in accordance with the Conceptual Framework for Implementation Fidelity.[25]

297x210mm (300 x 300 DPI)



# BMJ Open

## The RETURN to work After stroke (RETAK) Trial: protocol for a mixed-methods process evaluation using normalisation process theory

|                                 |                                                                                                                                                                                                                                                                                                                                                                                                                                                                                                                                                                                                                                                                                                                                                                                                                                                                                                                                                                                                                                                                                                                                                                                                                                                                                                                                                                                                                                                      |
|---------------------------------|------------------------------------------------------------------------------------------------------------------------------------------------------------------------------------------------------------------------------------------------------------------------------------------------------------------------------------------------------------------------------------------------------------------------------------------------------------------------------------------------------------------------------------------------------------------------------------------------------------------------------------------------------------------------------------------------------------------------------------------------------------------------------------------------------------------------------------------------------------------------------------------------------------------------------------------------------------------------------------------------------------------------------------------------------------------------------------------------------------------------------------------------------------------------------------------------------------------------------------------------------------------------------------------------------------------------------------------------------------------------------------------------------------------------------------------------------|
| Journal:                        | <i>BMJ Open</i>                                                                                                                                                                                                                                                                                                                                                                                                                                                                                                                                                                                                                                                                                                                                                                                                                                                                                                                                                                                                                                                                                                                                                                                                                                                                                                                                                                                                                                      |
| Manuscript ID                   | bmjopen-2021-053111.R1                                                                                                                                                                                                                                                                                                                                                                                                                                                                                                                                                                                                                                                                                                                                                                                                                                                                                                                                                                                                                                                                                                                                                                                                                                                                                                                                                                                                                               |
| Article Type:                   | Protocol                                                                                                                                                                                                                                                                                                                                                                                                                                                                                                                                                                                                                                                                                                                                                                                                                                                                                                                                                                                                                                                                                                                                                                                                                                                                                                                                                                                                                                             |
| Date Submitted by the Author:   | 23-Jan-2022                                                                                                                                                                                                                                                                                                                                                                                                                                                                                                                                                                                                                                                                                                                                                                                                                                                                                                                                                                                                                                                                                                                                                                                                                                                                                                                                                                                                                                          |
| Complete List of Authors:       | Radford, Kathryn A; University of Nottingham Faculty of Medicine and Health Sciences, Centre for Rehabilitation and Ageing Research<br>McKevitt, Christopher; King's College London, Department of Public Health Sciences<br>Clarke, Sara; University of Nottingham, Division of Rehabilitation, Aging and Wellbeing<br>Powers, Katie; University of Nottingham<br>Phillips, Julie; University of Nottingham<br>Craven, Kristelle; University of Nottingham<br>Watkins, Caroline; University of Central Lancashire, Faculty of Health and Wellbeing<br>Farrin, Amanda; University of Leeds, Clinical Trials Research Unit<br>Holmes, Jain; University of Nottingham<br>Cripps, Rachel; King's College London<br>McLellan, Vicki; University of Leeds, Clinical Trials Unit<br>Sach, Tracey; University of East Anglia, School of Chemical Sciences and Pharmacy<br>Brindle, Richard; University of Leeds, Clinical Trials Unit<br>Holloway, Ivana; University of Leeds, Clinical Trials Unit<br>Hartley, Suzanne; University of Leeds, Clinical Trials Research Unit<br>Bowen, Audrey; The University of Manchester, DNEP, SBS, FBMH<br>O'Connor, Rory J.; University of Leeds<br>Stevens, Judith; University of Nottingham<br>Walker, Marion; University of Nottingham<br>Murray, John; University of Nottingham<br>Shone, Angela; University of Nottingham<br>Clarke, David; University of Leeds, Academic Unit of Elderly Care and Rehabilitation |
| <b>Primary Subject Heading</b>: | Cardiovascular medicine                                                                                                                                                                                                                                                                                                                                                                                                                                                                                                                                                                                                                                                                                                                                                                                                                                                                                                                                                                                                                                                                                                                                                                                                                                                                                                                                                                                                                              |
| Secondary Subject Heading:      | Rehabilitation medicine, Research methods, Qualitative research, Health services research, Occupational and environmental medicine                                                                                                                                                                                                                                                                                                                                                                                                                                                                                                                                                                                                                                                                                                                                                                                                                                                                                                                                                                                                                                                                                                                                                                                                                                                                                                                   |
| Keywords:                       | Stroke < NEUROLOGY, Clinical trials < THERAPEUTICS, STROKE MEDICINE                                                                                                                                                                                                                                                                                                                                                                                                                                                                                                                                                                                                                                                                                                                                                                                                                                                                                                                                                                                                                                                                                                                                                                                                                                                                                                                                                                                  |
|                                 |                                                                                                                                                                                                                                                                                                                                                                                                                                                                                                                                                                                                                                                                                                                                                                                                                                                                                                                                                                                                                                                                                                                                                                                                                                                                                                                                                                                                                                                      |

1  
2  
3  
4  
5  
6  
7  
8  
9  
10  
11  
12  
13  
14  
15  
16  
17  
18  
19  
20  
21  
22  
23  
24  
25  
26  
27  
28  
29  
30  
31  
32  
33  
34  
35  
36  
37  
38  
39  
40  
41  
42  
43  
44  
45  
46  
47  
48  
49  
50  
51  
52  
53  
54  
55  
56  
57  
58  
59  
60

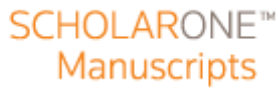

1  
2  
3 1 **TITLE**  
4  
5  
6

7 2 The RETurn to work After stroKE (RETAKE) Trial: protocol for a mixed-methods  
8  
9 3 process evaluation using normalisation process theory  
10  
11  
12 4

13  
14 5 **NAMES OF PROTOCOL CONTRIBUTORS**  
15  
16

17  
18 6 Kathryn A Radford<sup>1\*</sup>, Christopher McKeivitt<sup>9</sup>, Sara Clarke<sup>1</sup>, Katie Powers<sup>1</sup>, Julie  
19  
20 7 Phillips<sup>1</sup>, Kristelle Craven<sup>1</sup>, Caroline Watkins<sup>4</sup>, Amanda Farrin<sup>2</sup>, Jain Holmes<sup>1</sup>,  
21  
22 8 Rachel Cripps<sup>9</sup>, Vicki McLellan<sup>2</sup>, Tracey H Sach<sup>3</sup>, Richard Brindle<sup>2</sup>, Ivana Holloway<sup>2</sup>,  
23  
24 9 Suzanne Hartley<sup>2</sup>, Audrey Bowen<sup>8</sup>, Rory O'Connor<sup>5</sup>, Judith Stevens<sup>6</sup>, Marion  
25  
26 10 Walker<sup>1</sup>, John Murray<sup>7</sup>, Angela Shone<sup>10</sup>, David J Clarke<sup>11</sup>  
27  
28  
29

30 11 \*Correspondence: Kathryn.radford@nottingham.ac.uk  
31  
32

33 12 <sup>1</sup>Centre for Rehabilitation and Ageing Research, School of Medicine, B-Floor,  
34  
35 13 Medical School Queen's Medical Centre, Nottingham NG7 2UH. Full details of  
36  
37 14 authors' information are presented at the end of the article.  
38  
39  
40  
41

42 16 **Authors' information**  
43

44 17 <sup>1</sup>Professor of Rehabilitation Research, Centre for Rehabilitation and Ageing  
45  
46 18 Research, School of Medicine, B-Floor, Medical School Queen's Medical Centre,  
47  
48 19 Nottingham NG7 2UH.  
49  
50

51 20 <sup>2</sup>Clinical Trials Research Unit (CTRU), Leeds Institute of Clinical Trials Research,  
52  
53 21 Level 11 Worsley Building, University of Leeds, Leeds LS2 9JT.  
54

55  
56 22 <sup>3</sup>Health Economics Group, Room 2.37, Norwich Medical School, University of East  
57  
58 23 Anglia, Norwich Research Park, Norwich NR4 7TJ. <sup>4</sup>Lancashire Clinical Trials Unit,  
59  
60

1  
2  
3 24 Lancashire Applied health Research Collaboration Hub, Brook Building, Room 429,  
4  
5 25 University of Central Lancashire, Preston PR1 2HE. <sup>5</sup> Academic Department of  
6  
7 26 Rehabilitation Medicine, Leeds Institute of Molecular Medicine, University of Leeds,  
8  
9  
10 27 Level D, Martin Wing, Leeds General Infirmary, Leeds LS1 3EX. <sup>6</sup> Patient and Public  
11  
12 28 Involvement Collaborator, Hampshire, UK. <sup>7</sup> Different Strokes, Raphael House, Ilford,  
13  
14 29 London IG1 1YT. <sup>8</sup> Geoffrey Jefferson Brain Research Centre, The Manchester  
15  
16 30 Academic Health Science Centre, Northern Care Alliance & University of  
17  
18 31 Manchester, Manchester M13 9PL. <sup>9</sup> Department of Population Health Sciences,  
19  
20 32 Faculty of Life Sciences & Medicine, King's College London, 5<sup>th</sup> Floor Addison  
21  
22 33 House, Guy's Campus, London SE1 1UL. <sup>10</sup> Research and Innovation, Jubilee  
23  
24 34 Conference Centre, Jubilee Campus, Wollaton Road, Nottingham NG8 1BB.  
25  
26  
27  
28  
29 35 <sup>11</sup> Visiting Associate Professor in Stroke Care Academic Unit for Ageing and Stroke  
30  
31 36 Research, Leeds Institute of Health Sciences  
32  
33  
34 37 University of Leeds, Leeds LS2 9JT, UK.  
35  
36  
37  
38  
39  
40  
41  
42  
43  
44  
45  
46  
47  
48 43 WORD COUNT: 3985 (minus abstract, strengths and limitations, tables/figures and  
49  
50 44 references)  
51  
52 45  
53  
54  
55  
56  
57  
58  
59  
60

1  
2  
3 **46 ABSTRACT**  
4  
5

6  
7 **47 Objectives**  
8  
9

10 This mixed-method process evaluation underpinned by Normalisation Process  
11 Theory (NPT) aims to measure fidelity to the intervention, understand the social and  
12 structural context in which the intervention is delivered, and identify barriers and  
13 structural context in which the intervention is delivered, and identify barriers and  
14 facilitators to intervention implementation.  
15  
16  
17  
18  
19

20  
21 **52 Setting**  
22

23 Return to Work after Stroke (RETAKE) is a multi-centre individual patient  
24 randomised controlled trial to determine whether Early Stroke Specialist Vocational  
25 Rehabilitation (ESSVR) plus usual care is a clinically and cost-effective therapy to  
26 facilitate return to work after stroke, compared with usual care alone. This protocol  
27 paper describes the embedded process evaluation.  
28  
29  
30  
31  
32  
33  
34

35  
36 **58 Participants and outcome measures**  
37

38 Intervention training for therapists will be observed and use of remote mentor  
39 support reviewed through documentary analysis. Fidelity will be assessed through  
40 participant questionnaires and analysis of therapy records, examining frequency,  
41 duration and content of ESSVR sessions. To understand the influence of social and  
42 structural contexts, the process evaluation will explore therapists' attitudes towards  
43 evidence-based practice, competency to deliver the intervention and evaluate  
44 potential sources of contamination. Longitudinal case studies incorporating non-  
45 participant observations will be conducted with a proportion of intervention and usual  
46 care participants. Semi-structured interviews with stroke survivors, carers,  
47 occupational therapists, mentors, service managers and employers will explore their  
48  
49  
50  
51  
52  
53  
54  
55  
56  
57  
58  
59  
60

1  
2  
3 69 experiences as RETAKE participants. Analysis of qualitative data will draw on  
4  
5 70 thematic and Framework approaches. Quantitative data analysis will include  
6  
7 71 regression models and descriptive statistics. Qualitative and quantitative data will be  
8  
9 72 independently analysed by process evaluation and Clinical Trials Research Unit  
10  
11 73 teams respectively. Linked data, e.g. fidelity and describing usual care will be  
12  
13 74 synthesised by comparing and integrating quantitative descriptive data with the  
14  
15 75 qualitative findings.  
16  
17  
18  
19  
20  
21

## 22 77 **Ethics and dissemination**

23  
24 78 Approval obtained through the East Midlands – Nottingham 2 Research Ethics  
25  
26 79 Committee (Ref: 18/EM/0019) and the National Health Service (NHS) Research  
27  
28 80 Authority. Dissemination via journal publications, stroke conferences, social media  
29  
30 81 and meetings with national Stroke clinical leads.  
31  
32  
33  
34  
35  
36

## 37 83 **Trial registration**

38  
39  
40 84 Registration number: ISRCTN: 12464275  
41  
42  
43  
44  
45

## 46 86 **KEYWORDS**

47  
48 87 Return to work, stroke, vocational rehabilitation, occupational therapy, complex  
49  
50 88 intervention, process evaluation, randomised controlled trial, mixed-methods,  
51  
52 89 qualitative, Normalisation Process Theory, Consolidated Framework for  
53  
54 90 Implementation Fidelity  
55  
56  
57  
58  
59  
60

## 92 STRENGTHS AND LIMITATIONS OF THIS STUDY

- 93 • A mixed-methods theory-driven process evaluation will generate detailed  
94 findings to assist in interpreting the results of a pragmatic, multi-centre  
95 individual patient randomised controlled trial of a complex vocational  
96 rehabilitation intervention, which crosses the work/health divide.
- 97 • This is one of the most comprehensive multi-site, multi-component, multi-  
98 stakeholder perspective process evaluations embedded in a stroke  
99 rehabilitation trial, involving detailed assessment of implementation fidelity,  
100 therapist competency to deliver the trial intervention, contamination logging  
101 and exploration of social and structural influences on intervention provision in  
102 post-stroke rehabilitation services.
- 103 • Longitudinal case studies with intervention and usual care will capture  
104 participant experiences of providing and experiencing the intervention  
105 including those of employers.
- 106 • The Covid19 pandemic limited researcher access to direct observation of  
107 face-to-face intervention delivery and employer interactions with stroke  
108 survivors in each site. Integration of interview data from different participant  
109 sources including stroke survivors and carers, occupational therapists and  
110 employers with available observational data is planned to address this  
111 limitation.

## 115 BACKGROUND

116 Approximately 100,000 people in the UK suffer from a stroke every year,[1] and  
117 around 1 in 4 are of working age.[2] Returning to work after a stroke is a major goal  
118 for stroke survivors, contributing to social identity, emotional and financial wellbeing,  
119 and conferring a sense of purpose and has benefits for the individual, the individual's  
120 family and the economy.[3] Despite this, only half of working age stroke survivors  
121 make a successful return to meaningful work, and they are two to three times more  
122 likely to be unemployed eight years after their stroke than the general population.[1]  
123 Although impairments in the stroke survivor's physical, cognitive and communication  
124 abilities can affect this,[4-5] social and environmental factors such as personal and  
125 employer beliefs and attitudes, job type and organisation size and the benefits  
126 system also play an important part.[6-7]

127  
128 Vocational rehabilitation (VR) is defined as whatever helps someone with a health  
129 problem to return to, or remain in, work and includes both work *and* work-related  
130 education.[8] It involves helping people find work, helping those who are in work but  
131 having difficulty, as well as supporting career progression in spite of illness or  
132 disability. The primary aim is to optimise work participation.[9] Existing research  
133 suggests that VR may help stroke survivors return to their previous job or find new  
134 work,[10-11] however trials to date involve small samples in non-UK settings.

135  
136 RETAKE is a multi-centre individual patient randomised controlled trial (RCT) which  
137 aims to determine the clinical and cost-effectiveness of an Early Stroke Specialist  
138 Vocational Rehabilitation (ESSVR) intervention in addition to usual NHS rehabilitation  
139 on stroke survivors' return to work at 12 months post-randomisation, compared to NHS



1  
2  
3 140 rehabilitation alone.[12] Acceptability and utility were assessed in a feasibility trial.[13]  
4  
5 141 ESSVR combines conventional occupational therapy (OT) with case coordination. The  
6  
7 142 intervention commences within two weeks of randomization and lasts up to 12 months  
8  
9 143 post-randomization. It is intended for delivery in the community as often as required  
10  
11 144 by individuals, as determined by a stroke specialist OT with additional VR training.  
12  
13 145 ESSVR includes the following: (a) assessing stroke impact on the person and their  
14  
15 146 job; (b) educating individuals, employers, and families about stroke impact on work,  
16  
17 147 and strategies to lessen impact (e.g., memory aids, fatigue management); (c) work  
18  
19 148 preparation, including opportunities to practice work skills; and (d) liaison with  
20  
21 149 employers to plan and monitor a phased return to work (RTW) (see Appendix I). The  
22  
23 150 target number of participants for the trial is 760 participants (420 ESSVR and 340  
24  
25 151 usual care) from 20 UK hospitals and linked early supported discharge/community  
26  
27 152 services. The RETAKE trial and embedded process evaluation commenced in June  
28  
29 153 2018 and will complete in March 2022. This period includes a funder approved  
30  
31 154 extension of seven months necessitated by an unplanned pause in recruitment during  
32  
33 155 the Covid19 pandemic.  
34  
35  
36  
37  
38  
39

40 156 Failure to implement evidence-based stroke rehabilitation interventions in clinical  
41  
42 157 practice may result in unnecessary suffering and disability.[14-15] Trialists must  
43  
44 158 consider future implementation in the real world when designing clinical trials, paying  
45  
46 159 particular attention to the context for intervention delivery and factors likely to  
47  
48 160 influence its uptake and use.[16] This is especially true for trials of complex  
49  
50 161 rehabilitation interventions, which comprise multiple interacting components, and  
51  
52 162 target a number of different organisational levels, making them particularly  
53  
54 163 challenging to implement. An embedded process evaluation provides for an in-depth  
55  
56 164 exploration of factors influencing the implementation of complex interventions.  
57  
58  
59  
60

1  
2  
3 165  
4  
5  
6 166 The Medical Research Council (MRC) argue for a systematic approach to designing  
7  
8 167 and conducting process evaluations, drawing on clear descriptions of intervention  
9  
10 168 theory and the identification of key process questions.[17] Mixed methods  
11  
12 169 approaches to process evaluation are increasingly common and consistent with the  
13  
14 170 MRC framework's emphasis on exploring and understanding the important  
15  
16  
17 171 relationship between context, mechanisms and implementation. Theory driven  
18  
19 172 process evaluations are recommended alongside complex intervention trials to  
20  
21 173 measure what is delivered. These measurements include fidelity (whether the  
22  
23 174 intervention was delivered as intended), dose (the quantity of intervention  
24  
25 175 implemented), and "reach" of interventions to understand how the intended audience  
26  
27  
28 176 interacts with the intervention.[17] Fidelity data are necessary to interpret  
29  
30 177 intervention outcomes, but despite an extensive literature supporting its importance,  
31  
32 178 fidelity is commonly under-reported in studies of complex rehabilitation interventions.  
33  
34 179 Whilst most trials of VR have not raised particular concerns about fidelity, ESSVR in  
35  
36 180 the RETAKE trial is an example of a particularly complex intervention that crosses  
37  
38 181 organisational boundaries, involves interactions between multiple stakeholders, is  
39  
40 182 highly individually tailored and requires behavioural change by the patient, their  
41  
42 183 family and employer. Therefore, in the process evaluation for the RETAKE trial we  
43  
44 184 have included specific methods to measure fidelity. Alongside a focus on fidelity, in-  
45  
46 185 depth qualitative exploration of participants' experiences of an intervention, and of  
47  
48 186 the social and structural context in which an intervention is provided, are essential  
49  
50 187 elements of process evaluation of complex interventions. This ensures any  
51  
52 188 adaptations made to tailor intervention to the individual and/or differing contexts,  
53  
54 189 which might undermine fidelity can be evaluated. Understanding and reporting how  
55  
56  
57  
58  
59  
60

1  
2  
3 190 the intervention (including training and support, communication and management  
4  
5 191 structures) is delivered is important for replication in clinical practice.[17] Such  
6  
7 192 evaluation aims to reduce the chance of discounting effective interventions (Type II  
8  
9 193 error) or erroneously attributing outcomes to treatment effectiveness, when  
10  
11 194 interventions are not delivered as intended (Type III Errors).[18 - 21] The approach is  
12  
13 195 designed to improve trial design and knowledge translation interventions enhancing  
14  
15 196 clinical implementation and reducing research waste.[22-23]  
16  
17  
18  
19  
20  
21  
22  
23  
24  
25  
26  
27  
28  
29  
30  
31

198 This paper reports the protocol for the process evaluation embedded in the RETAKE  
199 trial.

200

201

## 202 **AIMS AND OBJECTIVES**

### 203 **Aims**

204 To measure fidelity to the ESSVR intervention and understand the social and  
205 structural context in which the intervention is delivered and identify factors which  
206 may influence the quality of implementation.

207

### 208 **Objectives**

209 Fidelity measurement and competency assessment will

210 1. Ascertain intervention dose

211 2. Describe content of usual care and ESSVR

212 3. Describe levels of adherence to the ESSVR intervention

- 1  
2  
3 213 4. Understand the delivery of Usual Care and ESSVR.  
4  
5 214 5. Determine OTs competency to deliver ESSVR  
6  
7  
8  
9 215 Social and structural context will include  
10  
11 216 6. Describe participating sites.  
12  
13  
14 217 7. Understand professionals' experiences of being trained to deliver the intervention.  
15  
16 218 8. Understand experiences of delivering the intervention.  
17  
18 219 9. Understand the social and structural factors which support or act as barriers to the  
19  
20  
21 220 implementation of the intervention.  
22  
23 221 10. Understand participants' experience of being supported to return to work after  
24  
25 222 stroke.  
26  
27 223 11. Identify potential contaminants  
28  
29  
30 224  
31  
32 225  
33  
34  
35

## 36 226 **METHODS**

### 37 38 39 227 **Design**

40  
41  
42 228 Embedded theory-driven mixed-methods process evaluation incorporating qualitative  
43  
44 229 and quantitative methods. The process evaluation will draw on the intervention logic  
45  
46  
47 230 model developed by the Trialists (Figure 1) and will be underpinned by Normalisation  
48  
49 231 Process Theory (NPT), an implementation theory built on four constructs  
50  
51 232 (coherence, cognitive participation, collective action and reflexive monitoring) each  
52  
53 233 informed by four components.[24] NPT will be used in the development of data  
54  
55  
56 234 collection tools (interview topic guides and observation checklists [see Table 1]) and  
57  
58 235 as a sensitising lens in qualitative data analysis and interpretation. NPT constructs  
59  
60

236 will underpin the process evaluation and provide insights into the implementation and  
 237 integration of the intervention into participating stroke services. This will include how  
 238 the intervention is received, understood, implemented and how it could be  
 239 normalised into the current healthcare system.

240 **Table 1: Examples of question topics related to NPT constructs**

| <b>Normalisation<br/>Process Theory<br/>Constructs and<br/>components</b>                                                                                                              | <b>NHS Staff/<br/>therapist<br/>interview topics</b><br>(some may also<br>arise in informal<br>feedback during<br>training<br>observations)                                                                                            | <b>Stroke Participant<br/>interview topics</b><br>(some may also arise<br>in intervention / usual<br>care observations)                                                                                                                                                                                                                                                                          | <b>Employer<br/>interview topics</b>                                                                                                                      |
|----------------------------------------------------------------------------------------------------------------------------------------------------------------------------------------|----------------------------------------------------------------------------------------------------------------------------------------------------------------------------------------------------------------------------------------|--------------------------------------------------------------------------------------------------------------------------------------------------------------------------------------------------------------------------------------------------------------------------------------------------------------------------------------------------------------------------------------------------|-----------------------------------------------------------------------------------------------------------------------------------------------------------|
| <b>Coherence:</b> <ul style="list-style-type: none"> <li>• Differentiation</li> <li>• Communal specification</li> <li>• Individual specification</li> <li>• Internalisation</li> </ul> | How do staff describe the intervention?<br><br>How is the intervention similar to/different from usual care?<br><br>Who would (most) benefit from the intervention?                                                                    | Experiences of RTW support received: similarities/differences between control and intervention participants                                                                                                                                                                                                                                                                                      | Experience of liaising with the therapist and/or participant on RTW issues                                                                                |
| <b>Cognitive participation</b> <ul style="list-style-type: none"> <li>• Initiation</li> <li>• Enrolment</li> <li>• Legitimation</li> <li>• Activation</li> </ul>                       | Do staff see value/potential in the intervention?<br><br>Have they found the training and experience a worthwhile investment of time?<br><br>Do they feel they have the competence/ resources to deliver the intervention effectively? | What were their expectations? Did patients (& carers) value the intervention?<br><br>How did they respond to the therapists' suggestions?<br><br>Did they feel they had the ability/resources/confidence to progress through the sessions and ultimately RTW?<br><br>Context in which participant received RETAKE/acted on suggestions: social, financial, health state, access to opportunities | Expectations of the processes: liaising with therapist/patient and patient's RTW<br><br>(Prior) experience in supporting RTW for people with disabilities |
| <b>Collective action</b> <ul style="list-style-type: none"> <li>• Interactional workability</li> <li>• Relational integration</li> </ul>                                               | How compatible is the intervention with the existing stroke care pathway?<br><br>What other RTW                                                                                                                                        | How did participants accommodate the intervention sessions/follow up actions?<br><br>How did they manage/are                                                                                                                                                                                                                                                                                     | Views on who is responsible /roles in supporting RTW<br><br>Financial implications e.g. modifications                                                     |

|                                                                                                                                                                                                            |                                                                                                                                                                                                                                                                                    |                                                                                                                                                                                                                                                                          |                                                                                                                                                                                                                                                       |
|------------------------------------------------------------------------------------------------------------------------------------------------------------------------------------------------------------|------------------------------------------------------------------------------------------------------------------------------------------------------------------------------------------------------------------------------------------------------------------------------------|--------------------------------------------------------------------------------------------------------------------------------------------------------------------------------------------------------------------------------------------------------------------------|-------------------------------------------------------------------------------------------------------------------------------------------------------------------------------------------------------------------------------------------------------|
| <ul style="list-style-type: none"> <li>• Skill set workability</li> <li>• Contextual integration</li> </ul>                                                                                                | <p>services/resources exist locally? How does this intervention compare/complement those services? Describe working relationships with those services.</p> <p>Support from managers and colleagues during the intervention period</p>                                              | <p>they managing their RTW (if applicable)?</p> <p>Financial implications</p>                                                                                                                                                                                            |                                                                                                                                                                                                                                                       |
| <p><b>Reflexive monitoring</b></p> <ul style="list-style-type: none"> <li>• Systematisation</li> <li>• Communal appraisal</li> <li>• Individual appraisal</li> <li>• Reconfiguration</li> <li>•</li> </ul> | <p>Perceived effects on patients (&amp; carers)</p> <p>Views on time/resources invested in delivery vs impact</p> <p>What is needed to make it possible to roll out the intervention effectively? (Changes to intervention; changes in services/resources needed for delivery)</p> | <p>Perceived effects of RETAKE/other RTW support</p> <p>Views on time/resources invested in participation vs impact</p> <p>What was good about RETAKE and what could be improved? (Content of intervention sessions/work plans, timing, relationship with therapist)</p> | <p>Perceptions of benefit to employer/tutor/advisor</p> <p>Perceptions of benefit to employee</p> <p>What was helpful about discussions with therapist/participant?</p> <p>What further information/support would they have liked – at what time?</p> |

241

242

243 Figure 1. The ESSVR logic model.

244 Column 3 of the logic model identifies the core components of the ESSVR

245 intervention. A more detailed description of the development and feasibility testing of  
 246 the ESSVR intervention has been published previously. [13]

247

248 In addition, the Conceptual Framework for Implementation Fidelity (CFIF) (Figure 2)

249 will guide collection and analysis of quantitative data.[25] The CFIF outlines the

250 components and variables that make up and affect intervention fidelity and explains

251 how they relate to each other. Adherence includes content and dose (frequency,  
252 coverage and duration) of the delivery.[25]

253  
254 Figure 2. Assessment of fidelity and factors moderating ESSVR delivery in  
255 accordance with the Conceptual Framework for Implementation Fidelity.[25]

256

### 257 **Eligibility criteria**

258 Stroke survivors that meet the following criteria for inclusion in the RETAKE trial will  
259 be eligible to participate in the process evaluation:

- 260 • Age  $\geq 18$  years.
- 261 • Admitted to hospital with new stroke (all severities).
- 262 • In work at stroke onset (including self-employed, paid or voluntary).
- 263 • Willing and have capacity to provide informed consent to participate in the study.
- 264 • Have sufficient proficiency in English to contribute to the data collection required  
265 for research.

266 Potential participants who do not intend to return to work will be excluded. Potential  
267 participants with a transient ischaemic attack will be excluded.

268 Inclusion criteria for carers of potential participants:

- 269 • Nominated carer of consenting participant.
- 270 • Willing and have capacity to provide informed consent to participate in the  
271 study.
- 272 • Have sufficient proficiency in English to contribute to the data collection  
273 required for research.

274

## 275 **Informed Consent**

276 Potential participants will be provided with an information sheet and be provided the  
277 opportunity to ask questions of a researcher prior to consent. Written informed  
278 consent will be obtained from all participants. When a participant is randomised to  
279 the case study element, a researcher will contact the participant to gain consent for  
280 interview and observations. Consent will be reaffirmed at the start of interviews. This  
281 process will be the same for carer, employer, OT and NHS staff interviews. For  
282 employer interviews, additional consent to contact the employer will be requested  
283 from the case study participant before the employer is contacted. OTs who will  
284 deliver the ESSVR intervention and mentors supporting these OTs will be recruited  
285 prior to intervention training. NHS staff involved in the management, commissioning  
286 or delivery of stroke rehabilitation in each site participating in the RETAKE trial will  
287 be recruited.

## 289 **Sampling**

290 For professional and patient interviews, as far as possible we will use a purposive  
291 sampling strategy to ensure diversity in terms of geographical location (e.g. urban vs  
292 rural centres), level of staff seniority and participant sociodemographic variables  
293 (including gender and socio-economic status). See Table 2 for the timepoints at  
294 which data collection is planned.

## 296 **Patient and Public Involvement Statement**

297 Stroke survivors are involved in all stages of the research cycle.

298 *Design and development.*



299 Two stroke survivors are co-applicants on the grant and assisted in identifying the  
300 research questions, designing the study and developing the trial protocol.

301 *Delivery.*

302 Two PPI are members of the Trial Steering Committee, and two are members of the  
303 Trial Management Group. Additionally, our RETAKE PPI (Patient & Public  
304 Involvement) group, which has six members, meets quarterly. Examples of the work  
305 achieved by the PPI group to date are:

- 306 • Helping define the primary outcome and defining 'voluntary work' which is  
307 included in the definition of the primary outcome.
- 308 • Evaluating all patient facing material including aphasia friendly recruitment  
309 material.
- 310 • Co-development of interview topic guides for trial participants and  
311 occupational therapists.
- 312 • Overcoming problems with recruitment. For example, resources and  
313 narratives to assist recruiters in approaching people with severe stroke.
- 314 • Assisting in the design of new materials to promote follow up e.g. including a  
315 'patient journey leaflet' and Thankyou cards.
- 316 • Helping reduce the length of follow-up questionnaires.
- 317 • Advising on communicating with participants during the pandemic.
- 318 • Changes to the Excess Treatment Cost payment models during trial, caused  
319 problems for the study. One PPI member wrote directly to Directors of the  
320 NIHR, NHS England, Health and Social Care and the leads for the NIHR  
321 Clinical Research Network to explain the impact that these changes on the  
322 trial. She received a prompt response which was extremely helpful to the  
323 research team. This has assisted us in explaining the new system to clinical  
324 colleagues and researchers in the Trusts.
- 325 • Co-Development of a trial website and trial newsletters.

326 A draft report on the process evaluation findings will be presented to the PPI group  
327 for their consideration and comments prior to submission of the final report to the  
328 funder and as part of planning publications and dissemination. The PPI group will be  
329 involved in writing up and presenting study findings.

330

331 **Data Collection**

332 The process evaluation will employ qualitative and quantitative methods to address  
 333 the research questions. Table 2 illustrates the relationship between the process  
 334 evaluation aims, research questions, data sources and data collection methods. The  
 335 following section describes each data source in more detail.

336

337 **Table 2: RETAKE process evaluation research questions and data sources**

338

| Aims                                                        | Research questions                                        | Data Source(s)                                                                                                                                                     | Method(s)                    | Timepoint                                                                  |
|-------------------------------------------------------------|-----------------------------------------------------------|--------------------------------------------------------------------------------------------------------------------------------------------------------------------|------------------------------|----------------------------------------------------------------------------|
| <b>Measure fidelity to the intervention</b>                 | What is the intervention dose, intensity and duration?    | <ul style="list-style-type: none"> <li>Intervention content case report forms (CRFs)</li> </ul>                                                                    | Quantitative                 | Months 3-45                                                                |
|                                                             | What is the (reported) content of the ESSVR intervention? | <ul style="list-style-type: none"> <li>Intervention content CRFs.</li> <li>NHS therapy records.</li> </ul>                                                         | Quantitative and qualitative | Months 3-45                                                                |
|                                                             | What is the content of usual care?                        | <ul style="list-style-type: none"> <li>Stroke survivor-reported resource use data.</li> <li>Stroke survivor carer and OT interviews</li> </ul>                     |                              | Months 12-45                                                               |
|                                                             | Was the intervention delivered with fidelity?             | <ul style="list-style-type: none"> <li>Fidelity checklist,</li> <li>Intervention content CRFs</li> <li>Mentoring records,</li> <li>RETAKE OT interviews</li> </ul> | Quantitative and qualitative | Months 12-36                                                               |
| What factors affect implementation fidelity?                |                                                           |                                                                                                                                                                    |                              | Months 12-18                                                               |
| Are RETAKE OTs competent to deliver the ESSVR intervention? |                                                           | <ul style="list-style-type: none"> <li>Individual OT performance in assessed vignettes at</li> </ul>                                                               | Quantitative                 | Months 1-8 and as new OT join the trial and 6 and 12 months post training. |

|                                                                                                                                                       |                                                                                                                                     |                                                                                                                                                         |                              |                                                                                                                             |
|-------------------------------------------------------------------------------------------------------------------------------------------------------|-------------------------------------------------------------------------------------------------------------------------------------|---------------------------------------------------------------------------------------------------------------------------------------------------------|------------------------------|-----------------------------------------------------------------------------------------------------------------------------|
|                                                                                                                                                       |                                                                                                                                     | <ul style="list-style-type: none"> <li>baseline and 6 months</li> <li>• RETAKE OT case record reviews at 12 months post training</li> </ul>             |                              |                                                                                                                             |
| <p><b>Understand the social and structural context which may influence intervention implementation and future embedding in practice settings.</b></p> | What is the context for intervention delivery?                                                                                      | <ul style="list-style-type: none"> <li>• Site survey at baseline, mid-point and end of intervention delivery</li> </ul>                                 | Quantitative and qualitative | Months 1, 18 and 36*<br>*later timepoint for end of intervention delivery where sites recruit beyond the Covid19 extension. |
|                                                                                                                                                       | What services are in place for supporting patients in return to work?                                                               | <ul style="list-style-type: none"> <li>• Site survey at baseline, mid-point and end of intervention delivery</li> </ul>                                 | Quantitative and qualitative | As above.                                                                                                                   |
|                                                                                                                                                       | What are the staffing levels at sites?                                                                                              | <ul style="list-style-type: none"> <li>• Site survey at baseline, mid-point and end of intervention delivery</li> </ul>                                 | Quantitative and qualitative | As above                                                                                                                    |
|                                                                                                                                                       | Potential for contamination: Are there proposed or actual VR service developments or changes in practice in place/ planned at site? | <ul style="list-style-type: none"> <li>• Site survey at baseline, mid-point and end of intervention delivery</li> <li>• NHS staff interviews</li> </ul> | Quantitative and qualitative | As above.                                                                                                                   |
|                                                                                                                                                       | What are the RETAKE OTs' perceptions of training and mentoring to deliver the intervention?                                         | <ul style="list-style-type: none"> <li>• Observations at training sessions</li> <li>• RETAKE OT interviews</li> </ul>                                   | Qualitative                  | Months 1-8 and as new OT join the trial.                                                                                    |
|                                                                                                                                                       | How do OTs experience delivering the intervention?                                                                                  | <ul style="list-style-type: none"> <li>• Observations of ESSVR sessions</li> <li>• RETAKE OT interviews</li> <li>• Mentoring records</li> </ul>         | Qualitative                  | Months 12-18<br>Months 12-18<br>Months 12-45                                                                                |
|                                                                                                                                                       | What are the social and structural factors supporting or acting as barriers to intervention implementation?                         | <ul style="list-style-type: none"> <li>• Observations of usual care and ESSVR sessions</li> <li>• RETAKE OT interviews</li> </ul>                       | Qualitative                  | Months 1-8<br>Months 12-18<br>Months 12-18<br>Months 12-24                                                                  |

|  |                                                                                 |                                                                                                                                                  |             |                                              |
|--|---------------------------------------------------------------------------------|--------------------------------------------------------------------------------------------------------------------------------------------------|-------------|----------------------------------------------|
|  |                                                                                 | <ul style="list-style-type: none"> <li>• Usual Care therapist interviews</li> <li>• NHS Staff interviews</li> <li>• Mentor interviews</li> </ul> |             | Months 6-8                                   |
|  | How do participants' experience being supported to return to work after stroke? | <ul style="list-style-type: none"> <li>• Stroke survivor interviews</li> <li>• Carer interviews</li> <li>• Employer interviews</li> </ul>        | Qualitative | Months 12-24<br>Months 12-24<br>Months 12-24 |

339

340

### 341 Intervention content Case Report Forms (CRFs)

342 To check on fidelity in terms of (early) intervention within two weeks of recruitment,  
 343 initial Session CRFs (one per participant) record the Intervention start date and  
 344 whether this occurred within 8 weeks of stroke. Participant Summary CRFs record  
 345 the number of sessions attended out of those proposed and whether there was an  
 346 agreed ending for the OT led return to work support. To ascertain intervention dose  
 347 and describe intervention content, data will be extracted from intervention CRFs for  
 348 all participants (see Table 3). Therapists record each intervention session against  
 349 pre-defined components, on an 'Intervention content CRF'.<sup>[13]</sup> These data will be  
 350 used to identify which components of the intervention were delivered, to what extent  
 351 therapists adhered to the intervention process described in the RETAKE manual,  
 352 and to what extent participants adhered to the intervention. For case study  
 353 participants only, content data will be cross-referenced with the OT's clinical case  
 354 notes and additional data extracted to explain how the RETAKE intervention  
 355 interacts with usual care and other services such as employment services.  
 356 Participants' consent includes permission for members of the trials team to access  
 357 their therapy records.

1  
2  
3 358 Describing usual care  
4

5  
6 359 To describe the content of the intervention and of usual care, resource use questions  
7  
8 360 pertaining to participants' use of health and social care services over the previous  
9  
10 361 three months will be completed by all participants at three, six- and twelve-months  
11  
12 362 post-randomisation as part of follow-up. This data will be used to describe the  
13  
14 363 content of usual care, and in case study participants (n=38) will be triangulated with  
15  
16 364 therapists' clinical notes and participant interview transcripts.  
17  
18  
19  
20  
21  
22  
23  
24  
25  
26  
27  
28  
29  
30  
31  
32  
33  
34  
35  
36  
37  
38  
39  
40  
41  
42  
43  
44  
45  
46  
47  
48  
49  
50  
51  
52  
53  
54  
55  
56  
57  
58  
59  
60

1  
2  
3 365 Fidelity  
4  
5

6 366 To assess implementation fidelity a range of data collection methods informed by the  
7  
8 367 CFIF will be used (see Table 3).[25]  
9  
10

11  
12 368  
13  
14

15 369 Therapist competency assessment  
16  
17

18 370 Following attendance at a two-day, manualised face-to-face training session with VR  
19  
20 371 expert trainers and again at refresher training six months later, retake OTs  
21  
22 372 competence will be assessed using OTs written responses to questions based on  
23  
24 373 vignettes depicting novel RTW after stroke scenarios. Model answers developed by  
25  
26 374 the training team will be used to measure competence using criteria based on  
27  
28 375 knowledge of the intervention process (40%), clinical reasoning (50%) and written  
29  
30 376 communication (10%). Scores will be mapped to a rubric identifying OTs as highly  
31  
32 377 competent ( $\geq 70\%$ ), competent (50-69%) or needing additional support ( $\leq 49\%$ ) (see  
33  
34 378 Appendix II). In addition, as mentors meet with mentees on a monthly basis, informal  
35  
36 379 monitoring of OT competency can occur. If required, action can be taken to  
37  
38 380 addresses issues of concern identified by mentor or mentee. After 12 months of  
39  
40 381 delivering the intervention RETAKE OTs competence will be reassessed by  
41  
42 382 evaluating the intervention delivered in a random selection of completed intervention  
43  
44 383 case records (one participant per RETAKE OT) against the trainer's expert opinion.  
45  
46 384 The trainer will review the selected case records against the intervention  
47  
48 385 mechanisms identified in the logic model and confirm whether the intervention  
49  
50 386 delivered is consistent with the intervention that would have been delivered by the  
51  
52 387 trainer as an expert return to work related occupational therapy.  
53  
54  
55  
56  
57  
58  
59  
60

388

389

## 390 Fidelity Checklist

391 A fidelity checklist based on the RETAKE intervention logic model (see Figure 1) and  
 392 RETAKE intervention process and components will be applied to complete case  
 393 records (Content of Intervention CRFs, RETAKE OT case notes and Initial Session  
 394 CRFs) from a random selection of stroke participants randomised to receive the  
 395 RETAKE intervention (one per treating RETAKE OT). This will be used in measuring  
 396 adherence to the RETAKE process and identifying factors affecting adherence.

397

398 **Table 3. CFIF led data extraction for Fidelity Assessment:**

399

| Fidelity Measure | CFIF Construct*                         | Measurement tool                                | Data for extraction                                               | Time point                                                         |
|------------------|-----------------------------------------|-------------------------------------------------|-------------------------------------------------------------------|--------------------------------------------------------------------|
| Frequency        | <b>Adherence and moderating factors</b> | <b>Initial Session Case Report Forms (CRFs)</b> | Intervention start date and end date                              | One CRF per participant at Initial session.                        |
| Duration         |                                         | <b>Participant Summary CRFs</b>                 | Number of proposed and attended sessions                          | One CRF per participant completed throughout intervention delivery |
|                  |                                         |                                                 | Whether there was an agreed ending for OT return to work support. |                                                                    |

|                                                                                     |                                         |                                                                                        |                                                                                                                   |                                                                                       |
|-------------------------------------------------------------------------------------|-----------------------------------------|----------------------------------------------------------------------------------------|-------------------------------------------------------------------------------------------------------------------|---------------------------------------------------------------------------------------|
| Intensity (time spent per session)<br>Dose (number of sessions)                     | <b>Adherence</b>                        | <b>Intervention content CRF</b><br><br><b>OT clinical records (RETAKE+ Usual Care)</b> | Time spent (in minutes) on VR activities per session<br><br>Description of intervention delivered in each session | One completed following every intervention session<br><br>In case study participants. |
| Therapist adherence<br>Factors affecting adherence                                  | <b>Adherence and moderating factors</b> | <b>Fidelity Checklist</b>                                                              | Components delivered, factors affecting delivery<br>RETAKE process followed Y/N                                   | Applied to one randomly selected completed case per RETAKE OT                         |
| Real time therapist adherence<br>Factors affecting adherence                        | <b>Adherence and moderating factors</b> | <b>Mentoring CRFs</b>                                                                  | Mentor's concerns about adherence<br>Factors affecting intervention delivery<br><br>Potential solutions           | Completed monthly by mentors                                                          |
| Barriers and enablers to intervention delivery                                      | <b>Moderating factors</b>               | <b>Interviews with RETAKE Therapists</b>                                               | Factors affecting intervention delivery<br><br>Potential solutions (developed by OT)                              | In a random selection of cases during intervention delivery at 3, 6 and 12 months     |
| Acceptability of the intervention<br>Barriers and enablers to intervention delivery | <b>Moderating factors</b>               | <b>Interviews with stroke participants, carers, employers and NHS staff</b>            | Acceptability of intervention<br>Factors affecting delivery<br>Potential solutions to barriers                    | Throughout intervention delivery in case studies                                      |

400 Key; \*CFIF Adherence includes intervention content, dose, coverage, frequency and  
 401 duration of intervention; CFIF Moderating factors includes participant



1  
2  
3 402 *responsiveness, intervention complexity, strategies to facilitate implementation,*  
4  
5 403 *quality of delivery, recruitment, and context.*  
6  
7

8 404

9  
10  
11 405 **Mentor interviews and records**

12  
13  
14 406 *Mentoring records*

15  
16  
17 407 Following training, each treating OT will be assigned a mentor with extensive  
18  
19 408 knowledge and experience of vocational rehabilitation. Mentoring will take place  
20  
21 409 monthly via teleconference in small groups (four to six therapists) and serve as an  
22  
23 410 intervention implementation support mechanism. RETAKE OTs will be able to  
24  
25 411 discuss any difficulties they are experiencing, ask questions and share best practice  
26  
27 412 with other OTs and their mentor. This process will also facilitate communication  
28  
29 413 between the trial team and enable barriers to implementation and contamination  
30  
31 414 risks to be reported. Key discussion points will be recorded by mentors using a  
32  
33 415 mentoring record form for each session. These records, along with all email  
34  
35 416 correspondence between mentor and mentees will be collected for qualitative  
36  
37 417 content analysis.  
38  
39  
40  
41  
42

43 418 *Mentor Interviews*

44  
45  
46 419 Semi-structured interviews will be conducted by two research assistants (SC and  
47  
48 420 KC) with all mentors (n=6) to explore their experiences of supporting RETAKE OTs  
49  
50 421 to deliver the intervention, and ascertain their views of organisational, social and  
51  
52 422 other factors contributing to or affecting delivery of the intervention.  
53  
54

55 423  
56  
57  
58  
59  
60

1  
2  
3 424 Social and structural context  
4  
5

6  
7 425 *Site survey*  
8

9 426 To describe participating sites and identify potential contaminants, sites will be asked  
10  
11 427 to complete a questionnaire by telephone at three time points; prior to recruitment,  
12  
13 428 halfway through, and at the end of the intervention period. This will contribute to  
14  
15 429 understanding contextual influences through capturing data on existing stroke care  
16  
17 430 pathways and resources (including staff and services) available for supporting  
18  
19 431 participants in a return to work. It will also identify potential contamination risks  
20  
21 432 associated with proposed or planned VR service developments or changes in  
22  
23 433 practice that may influence trial outcomes.  
24  
25  
26  
27

28 434

29  
30  
31 435 Therapist training  
32

33  
34 436 *Non-participant observations*  
35

36  
37 437 To understand OT's experiences of being trained to deliver the intervention, a  
38  
39 438 research assistant (RC) will observe up to four training sessions delivered by the  
40  
41 439 training team. A checklist will be developed using NPT constructs to guide  
42  
43 440 observations. Non-participant observations aim to identify; whether therapists  
44  
45 441 understand the intervention and their role in implementation, whether they think the  
46  
47 442 RETAKE intervention can be integrated into existing practice and any contextual  
48  
49 443 factors affecting the trial.  
50

51 444

52  
53  
54  
55 445 To describe adherence to the intervention, a researcher will observe up to three  
56  
57 446 sessions for each case study participant in the intervention and usual care arms of  
58  
59 447 the trial. Non-participant observations will be conducted using prompts for structured  
60

1  
2  
3 448 observation and unstructured field notes.[26] Participant selection for inclusion the  
4  
5 449 case study element is described below.  
6  
7  
8

9 450

#### 12 451 Interviews with Occupational Therapists

15 452 Semi-structured interviews will be conducted by a research assistant (RC) with a  
16  
17 453 minimum of one OT per site following their initial RETAKE training to explore their  
18  
19 454 experience of training, the mentoring process and their confidence in intervention  
20  
21 455 delivery. OT's views of the intervention, barriers and facilitators to implementation,  
22  
23 456 and any organisational or social factors impacting on delivery will also be explored.  
24  
25 457 Interviews will take place following training and be repeated at two additional time-  
26  
27 458 points: mid-way through the RETAKE intervention delivery and at the end of the  
28  
29 459 study.  
30  
31  
32

33 460

#### 36 461 *Case studies*

38 462 Longitudinal case studies will be used to map the care received by RETAKE and  
39  
40 463 usual care participants to develop a more detailed understanding of participants'  
41  
42 464 (stroke survivors, carers, employers) and RETAKE OTs experiences of support for  
43  
44 465 RTW. A 5% subset of participants from both arms of the trial (total n=38) will be  
45  
46 466 randomly selected and invited to participate in the case study element of the process  
47  
48 467 evaluation.  
49  
50

51 468

#### 55 469 i) Case study interviews

57  
58 470 Semi-structured interviews will be conducted by two research assistants (SC and  
59  
60 471 KC) with case study participants at three time points: three, six-, and twelve-months

1  
2  
3 472 post-randomisation, about their experiences and views of and adherence to the  
4  
5 473 RETAKE intervention and the support they received to return to work. The case  
6  
7 474 study participants' carers (if nominated), their employers (where participant consent  
8  
9 is obtained) and the OTs providing support for RTW will be interviewed.  
10  
11  
12

#### 13 476 NHS staff interviews

14  
15  
16 477 To further understand the social and structural factors which influence the  
17  
18 478 implementation of the intervention, interviews will be conducted with up to two (n=34  
19  
20 479 in total) NHS staff involved in the management, commissioning, or delivery of stroke  
21  
22 480 rehabilitation within each trial site. Participating staff will be chosen using a mixture  
23  
24 481 of purposive and snowball sampling. This will be based on a full range of trial sites,  
25  
26 482 staff knowledgeable about the implementation of the intervention at their site, and  
27  
28 483 staff knowledgeable about the decision-making process relating to wider roll-out.  
29  
30  
31

32 484

#### 33 34 35 485 Additional participant interviews

36  
37  
38 486 An additional random 5% of study participants will be invited to participate in semi-  
39  
40 487 structured interviews at the end of the intervention period. These interviews will  
41  
42 488 explore participants' experience of the intervention as well as their perceptions and  
43  
44 489 experiences of returning to work.  
45  
46  
47

48 490

49  
50 491 All qualitative interviews will be conducted using a topic guide informed by NPT.  
51  
52 492 Examples of question topics and how they relate to the four NPT constructs are  
53  
54 493 shown in Table 1. Topic guides will be presented to the RETAKE Public and Patient  
55  
56 494 Involvement (PPI) group for comment prior to use. All interviews will be audio  
57  
58 495 recorded and transcribed in full.  
59  
60

1  
2  
3 496  
4  
5  
67 497 **Data Analysis**  
8  
910 498 Quantitative analysis  
11

12 499 The dose, duration and frequency of the ESSVR intervention will be calculated using  
13 data from completed CRFs in combination with NHS therapy records. The total time  
14 spent delivering the ESSVR intervention (face to face and non-face to face contact  
15 (liaison with the patient, employer and other stakeholders by letter/phone),  
16 administration and travel) will be identified. Details relating to the content of  
17 intervention sessions will be extracted to identify whether core components of  
18 ESSVR were delivered as intended (i.e., as specified in the intervention manual and  
19 logic model). Associations between therapist attributes, contextual factors and  
20 intervention fidelity (measured by deviations from the RETAKE core process) will be  
21 explored using regression models. Analysis will be conducted using Statistical  
22 Package for the Social Sciences (SPSS) (version 21.0 for Windows).  
23  
24  
25  
26  
27  
28  
29  
30  
31  
32  
33  
34  
35  
36  
37  
38  
39  
40

41 511 Describing Usual Care  
42  
43

44 512 Data regarding rehabilitation delivered in Usual Care will be extracted from resource  
45 use data in the follow-up questionnaires and from NHS Therapy records in case  
46 study participants randomised to Usual Care. These data will be used to inform the  
47 cost of Usual Care for the economic evaluation and describe and understand usual  
48 care provided during stroke rehabilitation in inpatient and community services.  
49 Quantitative analysis of these data will be conducted using Statistical Package for  
50 the Social Sciences (SPSS; Version 21.0 for Windows). Analysis of usual care data  
51 obtained from NHS Therapy records is described below.  
52  
53  
54  
55  
56  
57  
58  
59  
60

1  
2  
3 520  
4  
5  
67 521 Qualitative analysis  
8

9 522 Inductive (thematic analysis) and deductive (informed by NPT) approaches will be  
10 523 used to guide data analysis and interpretation. Observational and Interview data will  
11  
12 524 be transcribed verbatim and uploaded into QSR NVivo software for management.

13  
14  
15  
16 525 Descriptions of usual care in NHS Therapy records, observational field note data,  
17  
18 526 including researcher reflections and interview data will be analysed thematically.[27]

19  
20 527 Framework analysis will be used with the case study data. For each participant the  
21  
22 528 interview data will be coded in NVivo and then imported into a Framework matrix for  
23  
24 529 comparison both within the individual case (comparing views of stroke survivor,  
25  
26 530 carer, OT and employer) and across cases and sites. Analysis will proceed  
27  
28 531 iteratively with data collection to determine whether data saturation has been  
29  
30 532 achieved; researchers will draw on the RETAKE logic model (Figure 1). Throughout  
31  
32 533 the qualitative analysis, NPT will be used as a sensitising framework.

33  
34  
35  
36 534 Analysis of each qualitative data set will be conducted independently and then jointly  
37  
38 535 by at least two study team members (SC, KC, KP) to corroborate themes and  
39  
40 536 discuss any discrepancies. It will follow a standard inductive approach of data  
41  
42 537 familiarisation, line-by-line coding and development of broad themes. Themes will  
43  
44 538 then be mapped to NPT constructs as part of development and refinement of  
45  
46 539 broader conceptual explanatory categories. Researchers will keep a set of interim  
47  
48 540 summary notes documenting any reflexivity points and connections between the  
49  
50 541 data with NPT and the logic model, to aid analytical discussions with the wider  
51  
52 542 process evaluation team. Iterative testing of interpretation will occur through  
53  
54 543 discussion with and feedback from the PPI group and discussions within the  
55  
56 544 research team.

1  
2  
3 545  
4  
5  
67 546 **Synthesis of qualitative and quantitative data**  
8  
9

10 547 During the RETAKE trial the qualitative and quantitative data generated as part of  
11  
12 548 the process evaluation will be independently analysed by the process evaluation  
13  
14 549 team and the Clinical Trials Research Unit respectively. Data related to intervention  
15  
16 550 fidelity and description of usual care will be synthesised at the conclusion of the trial.  
17  
18 551 We will review and compare findings from related data sets, identify areas of  
19  
20 552 agreement and disagreement and develop explanations for the findings. Synthesis of  
21  
22 553 findings from both the quantitative and qualitative data generated will contribute  
23  
24 554 directly to the overall evaluation and explanation of the outcomes of the RETAKE  
25  
26 555 trial.  
27  
28  
29  
30

31  
32 556  
3334 557 **Ethics and dissemination**  
35

36 558 Ethics approval has been obtained through the East Midlands – Nottingham 2  
37  
38 559 Research Ethics Committee (REC) (Ref: 18/EM/0019) and the National Health  
39  
40 560 Service Research Authority. The procedures for gaining informed consent have been  
41  
42 561 detailed above. Dissemination will be via journal publications, stroke and  
43  
44 562 rehabilitation focused conferences, newsletter articles, social media, presentations to  
45  
46 563 clinicians and stroke survivors and meetings with national clinical leads for the  
47  
48 564 Stroke Plan and the NHS Plan.  
49  
50

51  
52  
53 565  
5455 566 **Availability of data and materials**  
56

57 567 No additional data will be made available.  
58  
59  
60

1  
2  
3 568  
4  
5  
6 569 **Competing interests**  
7  
8 570 The authors declare that they have no competing interests.  
9  
10 571  
11  
12 572 **Funding**  
13  
14  
15 573 This study is funded by the NIHR HTA programme (ref: 15/130/11). The views  
16  
17 574 expressed herein are those of the authors, not necessarily the NIHR, the Department  
18  
19 575 of Health and Social Care, or the NHS.  
20  
21  
22 576  
23  
24 577 **Authors' contributions**  
25  
26  
27 578 KR, CM, AFa, AB, ROC, MW, and CW conceived the study. KR, DJC, and CM  
28  
29 579 designed the process evaluation. KR, CM, DJC, SC, KC, JH, JP, TS, RC and KP  
30  
31 580 operationalized the process evaluation protocol. KR, JP, and JH designed the  
32  
33 581 intervention. AS has the role of trial sponsor. IH, RB, and AFa devised the data  
34  
35 582 management and statistical analysis plan. JS and JM acted as PPI collaborators to  
36  
37 583 support plans for trial design/delivery, management, and dissemination of trial  
38  
39 584 findings. VM and SH have responsibility for management of the trial. KR, SC and  
40  
41 585 DJC drafted the manuscript; all other authors read and approved the final version.  
42  
43  
44 586  
45  
46 587  
47  
48 588  
49  
50 589  
51  
52 590  
53  
54 591  
55  
56 592  
57  
58  
59  
60



1  
2  
3 593  
45 594  
67 595  
8

9 596

**REFERENCES**10  
11  
12 597  
13

14 598

1. Stroke Association. State of the Nation: stroke statistics. Stroke

16 599

Association. 2018.[https://www.stroke.org.uk/resources/state-nation-stroke-](https://www.stroke.org.uk/resources/state-nation-stroke-statistics)

18 600

statistics (accessed 27 Apr 2021).

20 601

2. Daniel K, Wolfe CD, Busch MA, et al. What are the social consequences of

22 602

stroke for working-aged adults? A systematic review. *Stroke*2009;40:e431-40.

24 603

3. Sinclair E, Radford K, Grant M, et al. Developing stroke-specific vocational

26 604

rehabilitation: a soft systems analysis of current service provision. *Disabil Rehabil*

28 605

2014;36:409-17.

30 606

4. Corr S, Wilmer S. Returning to work after a stroke: an important but neglected

32 607

area. *Br J Occup Ther* 2003;66:186-92.

34 608

5. Frank AO, Thurgood J. Vocational rehabilitation in the UK: opportunities for

36 609

health-care professionals. *Int J Ther Rehabil* 2006;13:126-34.

38 610

6. Lindström B, Röding J, Sundelin G. Positive attitudes and preserved high level of

40 611

motor performance are important factors for return to work in younger persons

42 612

after stroke: a national survey. *J Rehabil Med* 2009;41:714-8.

44 613

7. Palstam A, Westerlind E, Persson HC, et al. (2019). Work-related predictors for

46 614

return to work after stroke. *Acta Neurol Scand* 2019;139:382-388.

48 615

doi:10.1111/ane.13067

- 1  
2  
3 616 8. Waddell G, Burton AK, Kendall NA. Vocational rehabilitation—what works, for  
4  
5 617 whom, and when? (Report for the Vocational Rehabilitation Task Group).  
6  
7 618 London: TSO 2008.
- 9  
10 619 9. Escorpizo R, Reneman MF, Ekholm J, et al. A conceptual definition of vocational  
11  
12 620 rehabilitation based on the ICF: building a shared global  
13  
14 621 model. *J Occup Rehabil* 2011;21:126-33.
- 15  
16  
17 622 10. Ntsiea MV, Van Aswegen H, Lord S, et al. The effect of a workplace intervention  
18  
19 623 programme on return to work after stroke: a randomised controlled  
20  
21 624 trial. *Clin Rehabil* 2015;29:663-73.
- 22  
23  
24 625 11. Trexler LE, Trexler LC, Malec JF, et al. Prospective randomized controlled trial of  
25  
26 626 resource facilitation on community participation and vocational outcome following  
27  
28 627 brain injury. *J Head Trauma Rehabil* 2010;25:440-6.
- 29  
30  
31 628 12. Radford K, King K, McLellan V, et al. An individually randomised controlled multi-  
32  
33 629 centre pragmatic trial with embedded economic and process evaluations of early  
34  
35 630 vocational rehabilitation compared with usual care for stroke survivors: study  
36  
37 631 protocol for the RETurn to work After stroKE (RETAKE) trial. Submitted to  
38  
39 632 *Trials* 2020.
- 40  
41  
42 633 13. Grant M, Radford K, Sinclair E, Walker M. Return to work after stroke: recording,  
43  
44 634 measuring and describing occupational therapy intervention, *British Journal of*  
45  
46 635 *Occupational Therapy*, 2014; 77(9) 457-465.  
47  
48 636 <https://doi.org/10.4276/030802214X14098207541072>
- 49  
50  
51 637 14. Lynch EA, Chesworth BM, Connell LA. Implementation—The missing link in the  
52  
53 638 research translation pipeline: is it any wonder no one ever implements evidence-  
54  
55 639 based practice?. *Neurorehabil Neural Repair* 2018;32:751-61.
- 56  
57  
58  
59  
60

- 1  
2  
3 640 15. Glasziou P, Straus S, Brownlee S, et al. Evidence for underuse of effective  
4  
5 641 medical services around the world. *Lancet* 2017;390:169-  
6  
7 642 177. doi:10.1016/S0140-6736(16)30946-1  
8  
9  
10 643 16. Walker MF, Hoffmann TC, Brady MC, et al. Improving the development,  
11  
12 644 monitoring and reporting of stroke rehabilitation research: Consensus-based core  
13  
14 645 recommendations from the Stroke Recovery and Rehabilitation Roundtable. *Int J*  
15  
16 646 *Stroke* 2017;12:472-9.  
17  
18  
19 647 17. Moore GF, Audrey S, Barker M, et al. Process evaluation of complex  
20  
21 648 interventions: Medical Research Council guidance. *BMJ*2015;350:h1258.  
22  
23  
24 649 18. Basch CE, Sliepcevich EM, Gold RS, et al. Avoiding type III errors in health  
25  
26 650 education program evaluations: a case study. *Health Educ Q* 1985;12:315-31.  
27  
28  
29 651 19. Dusenbury L, Brannigan R, Falco M, et al. A review of research on fidelity of  
30  
31 652 implementation: implications for drug abuse prevention in school  
32  
33 653 settings. *Health Educ Res* 2003;18:237-56.  
34  
35  
36 654 20. Colditz GA, Emmons KM. The promise and challenges of dissemination and  
37  
38 655 implementation research. *Dissemination and implementation research in health:*  
39  
40 656 *Translating science to practice*2012;24:3-22.  
41  
42  
43 657 21. Bosch M, VanDerWeijden T, Wensing M, et al. Tailoring quality improvement  
44  
45 658 interventions to identified barriers: a multiple case analysis. *J Eval Clin*  
46  
47 659 *Pract*2007;13:161-8.  
48  
49 660 22. Levac D, Glegg SM, Sveistrup H, et al. A knowledge translation intervention to  
50  
51 661 enhance clinical application of a virtual reality system in stroke  
52  
53 662 rehabilitation. *BMC Health Serv Res*2016;16:557.  
54  
55  
56 663 23. Ioannidis JP, Greenland S, Hlatky MA, et al. Increasing value and reducing waste  
57  
58 664 in research design, conduct, and analysis. *Lancet* 2014;383:166-75.  
59  
60

- 1  
2  
3 665 24. May C, Murray E, Finch T, et al. Normalization process theory online users'  
4  
5 666 manual and toolkit. NPT: Normalization Process Theory.  
6  
7 667 2010. <http://www.normalizationprocess.org/> (accessed 27 Apr 2021).  
8  
9  
10 668 25. Carroll C, Patterson, M, Wood, S, et al. A conceptual framework for  
11  
12 669 implementation fidelity. *Implementation Sci*2007;2:40.  
13  
14 670 26. Ciesielska M, Boström KW, Öhlander M. Observational methods. In: Ciesielska  
15  
16 671 M, ed. *Qualitative Methodologies in Organization Studies Volume II: Methods and*  
17  
18 672 *Possibilities*. Cham, Switzerland. Springer 2018:33-52.  
19  
20 673 27. Braun V, Clarke V. Using thematic analysis in psychology. *Qual*  
21  
22 674 *Res Psychol* 2006;3:77-101.  
23  
24  
25  
26 675  
27  
28  
29 676  
30  
31  
32  
33  
34  
35  
36  
37  
38  
39  
40  
41  
42  
43  
44  
45  
46  
47  
48  
49  
50  
51  
52  
53  
54  
55  
56  
57  
58  
59  
60

**Early Stroke Specialist Vocational Rehabilitation (ESSVR) Logic Model**  
**Aim:** To support patients who have had a stroke to return to and remain in work.

Rationale for ESSVR

**The problem:**  
 -Return to work (RTW) is achieved by less than 50% of stroke survivors  
 -Work is essential for supporting health, wellbeing, and longevity  
 -Long-term unemployment linked to increased risk of depression, suicide, reduced quality of life, cardiovascular disease, and health-harming behaviours  
 -Vocational rehabilitation (VR) supports those disadvantaged by illness or disability to access, return to, and maintain employment or another useful occupation

Resources

**Resources required and context for intervention delivery:**  
 -Skilled OT, knowledgeable in stroke. Trained in ESSVR  
 -Experienced mentor support for OTs delivering ESSVR  
 -Stroke ward staff identify all patients employed at time of stroke & refer to VR OT  
 -Effective co-location - crossing boundaries between health, employment, III sector  
 -Stroke patient wants to work  
 -Supportive employer

RTW intervention

**Core ESSVR components and mechanisms:**  
 -VR OT **intervenes early** ≤8 weeks of stroke (gives early advice on impact of stroke & RTW to patient and healthcare professional)  
 -**Assesses** impact of stroke on person/family & job (analysis of work ability, worksite assessment)  
 -Delivers **individually tailored** VR (work preparation, RTW planning)  
 -**Communicates** openly in writing with stakeholders re work status  
 -**Coordinates** VR across all sectors  
 -**Provides education**, advice & emotional support to patient, family & employer  
 -**Mediates workplace adjustments**, negotiates phased RTW, provides feedback on performance  
 -**Monitors RTW** to ensure work sustainability (regular review, employer supported to provide feedback on work performance, feedback on progress and modification)  
 -**Explores alternatives** where current work cannot be sustained/is not feasible  
 -**Gradual withdrawal** of intervention, which patient can re-access as required

Individual, organisational and system linked outcomes

|                                                                                                                                                                                                                                                                                                                                                                                                                                                                                 |                                                                                                                                                                                                                                                                                                                                                                                      |                                                                                                                                                                                    |
|---------------------------------------------------------------------------------------------------------------------------------------------------------------------------------------------------------------------------------------------------------------------------------------------------------------------------------------------------------------------------------------------------------------------------------------------------------------------------------|--------------------------------------------------------------------------------------------------------------------------------------------------------------------------------------------------------------------------------------------------------------------------------------------------------------------------------------------------------------------------------------|------------------------------------------------------------------------------------------------------------------------------------------------------------------------------------|
| <p><b>Individual outcomes:</b><br/>                 -Health supported by being in good work<br/>                 -Patient satisfied with decisions made about work<br/>                 -Patient &amp; employer satisfied with intervention<br/>                 -Patient &amp; employer feel supported in job retention<br/>                 -Patient reports increased stroke confidence<br/>                 -Patient reports improved self-efficacy in managing at work</p> | <p><b>Organisational outcomes:</b><br/>                 -Prevent job loss<br/>                 -Increased opportunities for employer engagement by intervening early<br/>                 -Work &amp; workplace is appropriate for patient<br/>                 -Workplace adjustments &amp; strategies in place<br/>                 -Optimised productivity at work by patient</p> | <p><b>System outcomes:</b><br/>                 -Reduced health resource usage<br/>                 -Contributes to economy<br/>                 -Reduced Welfare benefits use</p> |
|---------------------------------------------------------------------------------------------------------------------------------------------------------------------------------------------------------------------------------------------------------------------------------------------------------------------------------------------------------------------------------------------------------------------------------------------------------------------------------|--------------------------------------------------------------------------------------------------------------------------------------------------------------------------------------------------------------------------------------------------------------------------------------------------------------------------------------------------------------------------------------|------------------------------------------------------------------------------------------------------------------------------------------------------------------------------------|

Trial outcome

**Trial outcome measurement:**  
 -EQ5D.5L, CaSM, HADS, NEADL, CIQ, Work Ability Index (1Question)  
 -Self Report RTW at 12 months  
 -RTW same employer (3,6,12 months)  
 -Days and -Hours worked (3,6,12 months)  
 -Process Evaluation including fidelity, NPT informed individual case studies, participant interviews (intervention and usual care), staff interviews.

**Moderating and contextual factors:** Legal employment framework; National Clinical Guidelines for Stroke; Clinical Commissioning for stroke services; Cross sector engagement in VR programme support; Stroke survivor support and social network.

1  
2  
3  
4  
5  
6  
7  
8  
9  
10  
11  
12  
13  
14  
15  
16  
17  
18  
19  
20  
21  
22  
23  
24  
25  
26  
27  
28  
29  
30  
31  
32  
33  
34  
35  
36  
37  
38  
39  
40  
41  
42  
43  
44  
45  
46  
47  
48  
49  
50  
51  
52  
53  
54  
55  
56  
57  
58  
59  
60

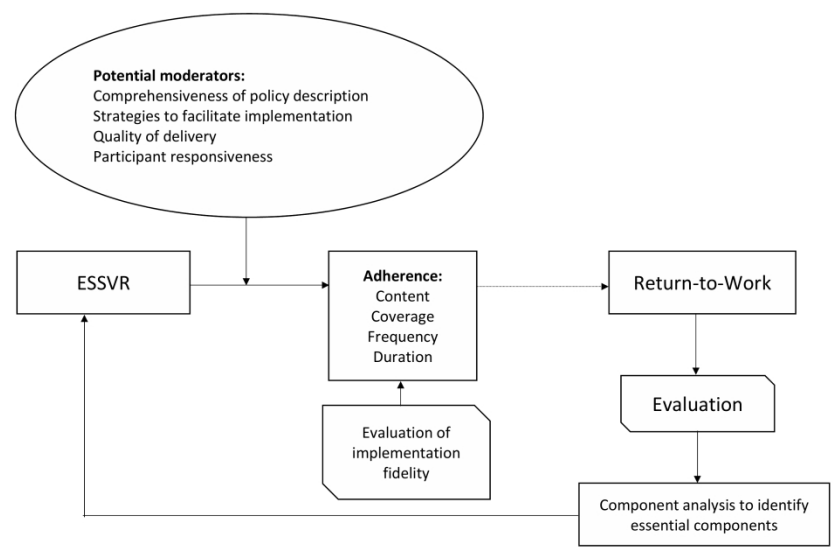

Figure 2: Assessment of fidelity and factors moderating ESSVR delivery in accordance with the Conceptual Framework for Implementation Fidelity

297x210mm (300 x 300 DPI)

|                                                                                                          |                                                                                                                                                                                                                                                                                                                                                                                                                                                                                                                                                                                                                                                                                                                                                                                                                                                                                                                                                                                                                                                                                                                                                                                                                                                                                                                                                                                                                                                                                                                                                                                                                                                                                                                                                                                                                                                                                                                                                                                                                                                                                                                                                                                                                                                                                                                                                                                                                                                                                                                                                                                                                                                                                                                                                                                                                                                                                                                                                                                                                                                                                                                                                                                                                                                                                                                                                    |
|----------------------------------------------------------------------------------------------------------|----------------------------------------------------------------------------------------------------------------------------------------------------------------------------------------------------------------------------------------------------------------------------------------------------------------------------------------------------------------------------------------------------------------------------------------------------------------------------------------------------------------------------------------------------------------------------------------------------------------------------------------------------------------------------------------------------------------------------------------------------------------------------------------------------------------------------------------------------------------------------------------------------------------------------------------------------------------------------------------------------------------------------------------------------------------------------------------------------------------------------------------------------------------------------------------------------------------------------------------------------------------------------------------------------------------------------------------------------------------------------------------------------------------------------------------------------------------------------------------------------------------------------------------------------------------------------------------------------------------------------------------------------------------------------------------------------------------------------------------------------------------------------------------------------------------------------------------------------------------------------------------------------------------------------------------------------------------------------------------------------------------------------------------------------------------------------------------------------------------------------------------------------------------------------------------------------------------------------------------------------------------------------------------------------------------------------------------------------------------------------------------------------------------------------------------------------------------------------------------------------------------------------------------------------------------------------------------------------------------------------------------------------------------------------------------------------------------------------------------------------------------------------------------------------------------------------------------------------------------------------------------------------------------------------------------------------------------------------------------------------------------------------------------------------------------------------------------------------------------------------------------------------------------------------------------------------------------------------------------------------------------------------------------------------------------------------------------------------|
| <p><b>Appendix I</b></p>                                                                                 | <p align="center"><b>ESSVR Description (TIDieR)</b></p>                                                                                                                                                                                                                                                                                                                                                                                                                                                                                                                                                                                                                                                                                                                                                                                                                                                                                                                                                                                                                                                                                                                                                                                                                                                                                                                                                                                                                                                                                                                                                                                                                                                                                                                                                                                                                                                                                                                                                                                                                                                                                                                                                                                                                                                                                                                                                                                                                                                                                                                                                                                                                                                                                                                                                                                                                                                                                                                                                                                                                                                                                                                                                                                                                                                                                            |
| <p><b>Brief Name</b><br/>(Provide the name or a phrase that describes the intervention.)</p>             | <p>1a) Early Stroke Specific Vocational Rehabilitation (ESSVR)<br/>1b) The Return to Work after Stroke (RETAKE) trial</p>                                                                                                                                                                                                                                                                                                                                                                                                                                                                                                                                                                                                                                                                                                                                                                                                                                                                                                                                                                                                                                                                                                                                                                                                                                                                                                                                                                                                                                                                                                                                                                                                                                                                                                                                                                                                                                                                                                                                                                                                                                                                                                                                                                                                                                                                                                                                                                                                                                                                                                                                                                                                                                                                                                                                                                                                                                                                                                                                                                                                                                                                                                                                                                                                                          |
| <p><b>WHY</b> Describe any rationale, theory, or goal of the elements essential to the intervention.</p> | <p><b>Rationale</b></p> <p>Stroke is common (&gt;100,000 strokes per annum in the UK) [1]. In spite of reperfusion therapy and secondary prevention, outcomes remain poor - almost two-thirds of survivors leave hospital with a disability, and a third experience depression and/or cognitive impairment. Stroke survivors of working age are 2-3 times more likely to be unemployed [1].</p> <p>Increasingly, there is an expectation that existing health and social care pathways for stroke survivors provide support for stroke patients intending to return to work [2-9]. Despite improvements in the organisation of stroke rehabilitation services following discharge, many stroke survivors fail to access this support because a) their work rehabilitation needs are not identified early after stroke b) many have hidden disabilities such as visual or cognitive impairments and fatigue, which are missed in the acute phase [10] and c) the criteria for referral to community rehabilitation are impairment based rather than needs led, meaning that a person with unmet needs for work participation alone (rather than a need for support from more than one healthcare professional e.g. Occupational Therapy and Speech and Language Therapy) may be unable to access support. d) Not all community stroke services provide rehabilitation that addresses work needs [11]. Where they do this may be time limited or fail to engage with employers in the workplace, as supporting a return to work is not always seen as the job of health [9]. Furthermore, stroke survivors themselves may not appreciate the true impact of the stroke on their workability until they attempt to return to work [12].</p> <p>Failure to provide this support, may lead to job loss, affecting physical, emotional, and financial wellbeing and quality of life [13,14]. Return to work is a recognised outcome of health interventions [15]. Supporting people who develop health conditions to return to work is recommended in stroke policy and clinical guidelines [3,4,5,7].</p> <p>The UK government has committed to reduce the employment gap (54% Vs 82%) between disabled and non-disabled people. Its goal is to see one million more disabled people in work by 2027 [16].</p> <p>The Equality Act requires employers to make reasonable adjustments, to accommodate the person in the workplace [17]. These adjustments may involve more breaks, reductions in working hours, reduced responsibilities, increased supervision, flexible working patterns and working from home and help from other people or agencies, including rehabilitation.</p> <p><b>The ‘theory of change underpinning ESSVR’</b></p> <p>Health based preparation and support for returning to work after stroke has typically been deficient in meeting stroke survivors work needs. ESSVR was designed to bridge the gap between existing stroke rehabilitation services, the employment and the voluntary sector in supporting stroke survivors in a return to work [10] Tested in a single centre feasibility trial we found evidence to suggest that that the intervention may have potential to support job retention at 12 months post stroke [18].</p> <p>The implicit theory of change on which ESSVR can be expressed as follows:</p> |

Stroke brings about physical and psychological impairments that are likely impact on the capacity to return to and remain in work

The ability to identify work needs early in the stroke pathway is missing from stroke services and vocational rehabilitation knowledge and skills gap is present in stroke rehabilitation services. Implementing mechanisms for identifying stroke survivors who are employed at stroke onset; educating the stroke care team about 'return to work' and teaching OTs with stroke specific knowledge basic skills in vocational rehabilitation, disability discrimination, how to evaluate jobs and assess work capability and match stroke survivor's abilities to job demands; how to engage with employers, and other employment sector stakeholders, to go into the workplace and how to negotiate reasonable adjustment and phased return to work will enable stroke services to support stroke survivors in a return to work.

The logic model (Figure 1) has the following underlying assumptions;

- *If we implement an early 'VR pathway' for stroke then, work is seen as a health outcome by stroke rehabilitation teams, conflicting advice prevented, increased confidence, knowledge and skills in VR, patient aware of available support & how to access; Early barriers to RTW identified e.g. environmental (job type), personal. Recognising work as an outcome of health interventions thus promoting a shared philosophy of rehabilitation to support return to work [Mechanism: Early Intervention, Collective Understanding]*
- *If we identify people who are employed at the time of stroke and refer to an Occupational Therapist trained in VR (VR OT) for information/advice/ support re return to work (RTW), then this will increase opportunities for RTW & prevent job loss; prevent people from falling into service gaps, and ensure work needs are met. [Mechanism: Early Identification]*
- *If we teach OTs basic skills in vocational rehabilitation (how to evaluate jobs and assess work capability, match the injury related disabilities to job demands; how to engage with employers, and other employment sector stakeholders, go into the workplace and how to negotiate reasonable adjustment and a phased return to work) then they will have the confidence, knowledge and skills to support stroke survivors in a return to work [Mechanism: VR Upskilling; Clinicians confident and empowered; Assessment]*
- *If the OT provides early (within 8 weeks of stroke) assessment, education and advice on the impact of stroke & RTW, then the impact of the stroke on the job role will be identified to inform a vocational rehabilitation plan. Persons requiring psychological support for mental health issues are identified and referred for support, resulting in improved physical and mental health and financial wellbeing. [Mechanisms: Assessment; Education Early intervention]*
- *If the OT delivers individually tailored vocational rehabilitation, engaging with the employer to negotiate workplace accommodations, a phased return to work, educating employers and monitors ongoing work ability, then, the person will be able to cope with work, resulting in reduced sickness absence and sustainable employment. [Mechanisms: Individual Tailoring; Accommodating stroke at work, Colocation, Employer Engagement, communication]*

ESSVR is a biopsychosocial intervention informed by the International Classification of Function (ICF) [19] and the 'Work Disability Arena' or Sherbrooke model [20]. It takes into consideration the overall context of an individual. It identifies the level of functioning at the body, person and societal level, as well as understanding the personal and environmental contextual factors that may impede or enhance work participation.



|                                                                                                                                                                                                                                                                                                                                                                                                                                                                                                            |                                                                                                                                                                                                                                                                                                                                                                                                                                                                                                                                                                                                                                                                                                                                                                                                                                                                                                                                                                                                                                                                                                                                                                                                                                                                                                                                                                                                                                                                                                                                                                                                                                                                                                                                                                                                                                                                                                                                                                                                                                                                                                                                                                                                                                                                                                                                                                                                                                                                                                                                                                                                                                                                                                                                                                                                                                                                                                                                                                                                                                                                                                                                                                                                                                                                                                                                                                                                                                                                                                                                                                                            |
|------------------------------------------------------------------------------------------------------------------------------------------------------------------------------------------------------------------------------------------------------------------------------------------------------------------------------------------------------------------------------------------------------------------------------------------------------------------------------------------------------------|--------------------------------------------------------------------------------------------------------------------------------------------------------------------------------------------------------------------------------------------------------------------------------------------------------------------------------------------------------------------------------------------------------------------------------------------------------------------------------------------------------------------------------------------------------------------------------------------------------------------------------------------------------------------------------------------------------------------------------------------------------------------------------------------------------------------------------------------------------------------------------------------------------------------------------------------------------------------------------------------------------------------------------------------------------------------------------------------------------------------------------------------------------------------------------------------------------------------------------------------------------------------------------------------------------------------------------------------------------------------------------------------------------------------------------------------------------------------------------------------------------------------------------------------------------------------------------------------------------------------------------------------------------------------------------------------------------------------------------------------------------------------------------------------------------------------------------------------------------------------------------------------------------------------------------------------------------------------------------------------------------------------------------------------------------------------------------------------------------------------------------------------------------------------------------------------------------------------------------------------------------------------------------------------------------------------------------------------------------------------------------------------------------------------------------------------------------------------------------------------------------------------------------------------------------------------------------------------------------------------------------------------------------------------------------------------------------------------------------------------------------------------------------------------------------------------------------------------------------------------------------------------------------------------------------------------------------------------------------------------------------------------------------------------------------------------------------------------------------------------------------------------------------------------------------------------------------------------------------------------------------------------------------------------------------------------------------------------------------------------------------------------------------------------------------------------------------------------------------------------------------------------------------------------------------------------------------------------|
|                                                                                                                                                                                                                                                                                                                                                                                                                                                                                                            | <p>It aims to prevent job loss by drawing on employment law and the Equality Act (2010) (17) to prevent disability discrimination and ensure “reasonable adjustments” are negotiated with employers to reduce the impact of stroke disability by accommodating (modifying) the stroke survivor’s job to enable a return to work. ESSVR also ensures patients are provided with appropriate individualised work-related physical and cognitive rehabilitation and self-management education to increase their ability to work.</p>                                                                                                                                                                                                                                                                                                                                                                                                                                                                                                                                                                                                                                                                                                                                                                                                                                                                                                                                                                                                                                                                                                                                                                                                                                                                                                                                                                                                                                                                                                                                                                                                                                                                                                                                                                                                                                                                                                                                                                                                                                                                                                                                                                                                                                                                                                                                                                                                                                                                                                                                                                                                                                                                                                                                                                                                                                                                                                                                                                                                                                                          |
| <p><b>WHAT</b></p> <p><b>Materials:</b><br/>Describe any physical or informational materials used in the intervention, including those provided to participants or used in intervention delivery or in training of intervention providers. Provide information on where the materials can be accessed (e.g. online appendix, URL).</p> <p><b>Procedures:</b><br/>Describe each of the procedures, activities, and/or processes used in the intervention, including any enabling or support activities.</p> | <p><b>Materials:</b></p> <p><b>Training:</b> Occupational therapists are provided with an ‘ESSVR Intervention manual’ detailing the intervention content, its rationale and objectives, processes to be followed and forms for use in documenting ESSVR delivery in the trial. The manual included examples of return to work plans, sample graded RTW planning, session and work review letters, sample letters to GP, discharge letters, letter to employer, sample report for occupational health and a list of other useful resources (below). The manual was sent to therapist two weeks before the training and used during the training to navigate them through the ESSVR intervention process and familiarise them with its contents and resources.</p> <p><b>Resources included:</b></p> <p>For Occupational Therapists</p> <ul style="list-style-type: none"> <li>• Employment and Support Allowance (ESA) Supporting letter and Guide to completing ESA (2012), See 50 9 esa50guide2012 (nawra.org.uk)</li> <li>• Allied Health Professions Fitness For Work Report (RCOT), Accessible via <a href="https://www.rcot.co.uk/practice-resources/standards-and-ethics/ahp-health-and-work-report">https://www.rcot.co.uk/practice-resources/standards-and-ethics/ahp-health-and-work-report</a></li> <li>• AHP Health and Work Report: Guidance for AHP practitioners on the use and completion of the Report (Allied health Professions Federation). See; Guidance-on-completion-of-AHP-Health-and-Work-Report.pdf (ahpf.org.uk)</li> <li>• Graded RTW planning leaflet (RETAKE Trial specific)</li> <li>• Tailored Adjustments Plan (Business Disability Forum, 2020) Accessible via Tailored Adjustments Plans - Business Disability Forum</li> <li>• Work Ability Support Scale (WSS) (Fadyl J, McPherson KM, Schultzer P, Turner-Stokes L., 2014) [21] Accessible via <a href="https://www.kcl.ac.uk/cicelysaunders/resources/tools/wss">https://www.kcl.ac.uk/cicelysaunders/resources/tools/wss</a></li> <li>• WSS Detailed work questionnaire, Accessible via <a href="https://www.kcl.ac.uk/cicelysaunders/resources/tools/wss">https://www.kcl.ac.uk/cicelysaunders/resources/tools/wss</a></li> <li>• WSS Brief work questionnaire and job matching, Accessible via <a href="https://www.kcl.ac.uk/cicelysaunders/resources/tools/wss">https://www.kcl.ac.uk/cicelysaunders/resources/tools/wss</a></li> <li>• THE CITY OF TORONTO S JOB DEMANDS ANALYSIS AND JOB MATCH SYSTEM (Lucas, 2017), accessible via; <a href="https://silo.tips/download/the-city-of-toronto-s-job-demands-analysis-and-job-match-system">https://silo.tips/download/the-city-of-toronto-s-job-demands-analysis-and-job-match-system</a></li> <li>• Beginners Guide to Benefits, Accessible via <a href="https://www.turn2us.org.uk/Benefit-guides/Beginner-s-Guide-to-Benefits/Checking-benefit-entitlement">https://www.turn2us.org.uk/Benefit-guides/Beginner-s-Guide-to-Benefits/Checking-benefit-entitlement</a></li> <li>• Good work for good health The difference occupational therapy makes, (RCOT, 2019) Accessible via ILSM Work report A4 7pp D7.pdf (rcot.co.uk)</li> </ul> <p>For Employers</p> <ul style="list-style-type: none"> <li>• Employees with Executive Functioning Deficits (Job Accommodation Network 2018) , Accessible via; Brain Injury (askjan.org)</li> <li>• Accommodation and Compliance Series: Employees with Speech-Language Impairment (Job Accommodations Network, 2019) Accessible via JAN-Job-accomadation-suggestions.pdf (dysphonia.org)</li> </ul> |

- Job accommodations for people with motor limitations from stroke (Morgantown, WV, Office of Disability Employment Policy, Job Accommodation Network, 2010) Accessible via Job accommodations for people with motor limitations from stroke - University of Missouri Libraries
- A complete guide to stroke for Employers (Stroke Association, 2019), See: f41cg\_a\_complete\_guide\_to\_stroke\_for\_employers\_v3\_oct\_2019.pdf,
- Information Pack -Work After Stroke - Information for Employers, (Different strokes, 2018) Available at: Work After Stroke (differentstrokes.co.uk)

#### For stroke survivors

- Information Pack Work After Stroke - Information for Family & Friends (Different Strokes, xxx year) Accessible via: Work After Stroke - Information for Family & Friends
- A\_complete\_guide\_to\_work\_and\_stroke.pdf See: Your rights at work after stroke | Stroke Association, (Stroke Association, UK)
- Driving after a Stoke guide; (Stroke Association, 2021) See f02\_driving\_v\_3.1\_web\_june\_21.pdf (stroke.org.uk)
- Stroke in people of working age (Stroke Association, 2014), Accessible via: stroke\_in\_people\_of\_working\_age.pdf
- Tailored Adjustments Plan (Business Disability Forum, 2020) Accessible via Tailored Adjustments Plans - Business Disability Forum

#### **Links provided to other Online Resources**

##### **Advisory services**

- ACAS- Advisory, Conciliation and Arbitration Service- provides support in assisting employment disputes including those related to disability management: <http://www.acas.org.uk>
- Citizens Advice Bureau: <http://www.citizensadvice.org.uk/>
- Disability Law Service: [www.dls.org.uk](http://www.dls.org.uk)
- Disability Rights UK <http://disabilityrightsuk.org/>
- Equality and Human Rights Commission <http://www.equalityhumanrights.com/>
- **Occupational Health Advisory Service** – Fit for Work offers free, expert and impartial advice to anyone looking for help with issues around health and work. You can browse our online resources, chat online to a specialist advisor, email a question or call our free advice line on 0800 032 6235 (English) or 0800 032 6233 (Cymraeg). <https://fitforwork.org/>

#### **Details of occupational health providers**

- Occupational health support can be very helpful in complex cases Occupational health services are sometimes provided by NHS or local authority services. To find details of providers in your area, contact:
- Commercial Occupational Health Provider Association [www.cohpa.co.uk](http://www.cohpa.co.uk)
- NHS Health at Work [www.nhshealthatwork.co.uk/support-for-business.asp](http://www.nhshealthatwork.co.uk/support-for-business.asp)
- Society of Occupational Medicine [www.som.org.uk](http://www.som.org.uk)
- Safe Effective Quality Occupational Health Service (list of approved occupational health providers) <http://www.seqohs.org>

#### **Job Centre Plus:**

- Disability Employment Advisers are based in Jobcentres, and work with claimants facing complex employment situations because of a disability or health condition. They can act as an advocate with prospective employers if necessary, aiming to identify work solutions that will overcome or minimise any difficulties related to an individual's disability in the work place. <https://www.gov.uk/specialist-employability-support>
- Welfare Benefits and Department for work and Pensions (DWP)
- Benefits (including Attendance Allowance, Employment Support Allowance, and Disability Living Allowance/Personal Independence Payment): <https://www.gov.uk/browse/disabilities/benefits>

- Access to Work information including contact details for all centres (for registration, the initial step for clients wanting to use this scheme): <https://www.gov.uk/access-to-work/overview>
- Benefits and Work website offers advice to people re benefits. Some free information, fee for access to additional support <http://www.benefitsandwork.co.uk/>

#### Debt issues

- <https://www.citizensadvice.org.uk/debt-and-money/>
- <https://www.nationaldebtline.org/>
- <http://www.debtadvicefoundation.org/>

#### Equipment advice:

- A huge range of IT accessibility info, assessments, resources: <http://www.abilitynet.org.uk/>
- Disabled Living Foundation: <http://www.dlf.org.uk>

#### Guidelines:

- Vocational Rehabilitation Association Guidelines- free to download upon registration: <https://vrassociationuk.com/>
- BSRM Publications free to download- VR and long term conditions; VR Interagency guidelines: <https://www.bsrm.org.uk/publications/publications>

#### Fit Note

- AHP Fitness to Work Report info: [http://www.ahpf.org.uk/AHP\\_Advisory\\_Fitness\\_for\\_Work\\_Report.htm](http://www.ahpf.org.uk/AHP_Advisory_Fitness_for_Work_Report.htm)
- Fit Note info: <https://www.gov.uk/government/collections/fit-note>
- Managing sickness absence, disputes and sick pay
- Gov.uk - <https://www.gov.uk/employers-sick-pay>

**The Health and Safety Executive** has provided guidance for employers and managers on managing sickness absence and return to work.

- [www.hse.gov.uk/pubns/priced/hsg249.pdf](http://www.hse.gov.uk/pubns/priced/hsg249.pdf)

**British Occupational Health Research Foundation** has also developed guidance for managing sickness absence and return to work. [www.bohrf.org.uk/downloads/Managing\\_Rehabilitation-Guidance.pdf](http://www.bohrf.org.uk/downloads/Managing_Rehabilitation-Guidance.pdf)

For questions about **Statutory Sick Pay** you can visit the HMRC website at <https://www.gov.uk/topic/business-tax/payee> or call them on 08457 143143.

**The Employer's Charter** helps employers understand what they can do in respect of a number of issues.

[www.gov.uk/government/uploads/system/uploads/attachment\\_data/file/32147/employerscharter.pdf](http://www.gov.uk/government/uploads/system/uploads/attachment_data/file/32147/employerscharter.pdf)

- Touchbase: DWP news about work, working age benefits, pensions and services (DWP, 2015)  
Accessible via: Touchbase: DWP news about work, working age benefits, pensions and services - GOV.UK ([www.gov.uk](http://www.gov.uk))

#### Job search:

- <https://www.gov.uk/jobsearch>
- <http://www.indeed.co.uk>
- <https://jobs.civilservice.gov.uk/company/nghr/jobs.cgi>
- <http://jobs.theguardian.com/>
- <http://www.jobs.nhs.uk/>
- <http://www.charityjob.co.uk/>
- <http://www.jobhuntersbible.com/>
- <http://www.jobsgopublic.com/searches/new>

**Stroke information**

- Different strokes - <https://differentstrokes.co.uk/> (for younger stroke pts)
- Stroke association <https://www.stroke.org.uk>

- **VR general:**

- MS Trust/Society and Headway - links to toolkits
- Job Accommodation Network <https://askjan.org/>
- British Association of Supported Employment <http://base-uk.org/>

- **Volunteering associations**

- <https://www.ncvo.org.uk/ncvo-volunteering>
- <https://do-it.org/>

- **Fitness/health information** <http://www.nhs.uk/Livewell/fitness/Pages/free-fitness.aspx>

- Cinema Exhibitor card <https://www.cinemauk.org.uk/key-issues/disability-and-access/cea-card/>
- If a person gets DLA, PIP or is registered blind, they can get this card and it entitles a free entry for another person
- Local walk for health schemes <http://www.walkingforhealth.org.uk/walkfinder/> -

- **Transport**

- DVLA (driver vehicle licencing authority)
- <https://www.gov.uk/stroke-and-driving> (patient information)
- <https://www.gov.uk/current-medical-guidelines-dvla-guidance-for-professionals>

- **Disabled bus pass**

- If not allowed to drive for a year due to their injury, they are entitled to a disabled bus pass
- <https://www.gov.uk/apply-for-disabled-bus-pass>

- **Goal Attainment Scaling (GAS) in Rehabilitation system**

<https://www.kcl.ac.uk/cicelysaunders/resources/tools/gas>

**Procedures:**

***Intervention Delivery***

ESSVR is an early, individually tailored, stroke specific job retention intervention. It adopts a problem- solving process, which involves vocational goal setting and regular progress review. It aims to adapt the environment and accommodate the stroke survivor at work. It also aims to educate the person to self-manage the condition at work.

It involves a trained vocational rehabilitation OT adopting a role as a case coordinator with a wider team of healthcare professionals, employers, family members and other agencies (e.g. occupational health and employment services, GPs, independent and voluntary sector services) to:

- Assess the impact of the stroke on the patient, family and the patient's role as a worker/student and their ability to do their job/study course.
- Educate participants, employers/tutors and families about the effects of stroke and its impact on work/education and find acceptable strategies to lessen the impact.
- Monitor and assess the patient's work/educational goals.
- Prepare people for work/education by establishing structured routines with gradually increased activity levels and opportunity to practice work skills, e.g., structured computerised cognitive stimulation to increase concentration, daily walks to increase physical stamina.
- Liaise with employers/tutors, employment advisors, student services and the healthcare team to advise about the effects of stroke and to plan and monitor a phased return to work.
- Alternatives to pre-injury employment are explored in cases where return to pre-existing employer is not feasible or unsustainable.

The Occupational Therapist VR role involves, negotiating workplace accommodations, communicating with employers, offering advice and emotional to the patient, the patient's family and employer, and exploring work alternatives as required. The case-coordination role involves the RETAKE OT actively coordinating the RTW and input from relevant services from across all sectors (health, work, independent, voluntary, education), communicating with all involved stakeholders, such as the participants GP Department for Work and Pensions Services, welfare rights and employer organisations e.g. occupational health, GPs and voluntary sector services e.g. the stroke Association. The aim being to maximise the use of all locally available resources and ensure consistent advice and support for the patient.

ESSVR is a process (rather than a set of predetermined components) that is broken into 3 stages;

**Stage 1: Early recovery and Work preparation:** The OT intervenes early, within 8 weeks of stroke onset, to ensure work is on the agenda and jobs are not relinquished but kept open. Assessment of the individual, the impact of the stroke and a detailed job analysis and liaison with family members takes place at this stage. Plans are made to prepare the RETAKE participant for work return by providing advice and information to the participant and their family and advise medical/other rehab staff to encourage the participant not to make immediate decisions about work i.e. leaving work or going back too soon, which may jeopardise their RTW or job retention. The RETAKE participant is encouraged to keep the channels of communication with the workplace open and the RETAKE OT offers to mediate if difficulties arise. Activities are undertaken at home, relevant to work or simulated to build up the stamina and skills required to return to specific work tasks or roles. These include physical, cognitive or communication based activities depending on how the stroke has affected the RETAKE participant and the demands of their job. Liaison with any other services the person is receiving takes place to ensure there is no overlap and the approach to VR is smoothly coordinated.

**Stage 2: Graded return to work:** This involves planning, negotiating and implementing a phased return to work (RTW). This might involve a worksite visit, negotiation of realistic timing and identification of workplace adjustments/accommodations to optimise RTW. Liaison with Human Resources (HR), occupational health, other employer bodies and medical teams may also take place. Information and education is provided for employers to increase their understanding of the impact of the stroke on the RETAKE participant and how this might influence their ability to meet job demands. The participant receives feedback on their work performance during this stage. This may involve regular reviews, feedback on progress and supporting the employer to provide feedback on work performance, and the implementation of any modifications to the RTW plan or work role.

**Stage 3: Job Retention:** This involves monitoring the participant's RTW to ensure work stability and troubleshooting issues that may arise with all stakeholders (patient, employer, family, others) and gradually withdrawing support when the work situation is stable. However, participants and employers can re-access this support as required up to 12 months post randomisation. In some cases where work cannot be sustained or is unfeasible, work alternatives e.g. voluntary work, changes in job type, career are explored. In some cases the intervention may involve supporting retirement or medical withdrawal from work.

The intervention is delivered in addition to the stroke participant's usual stroke rehabilitation. This will vary depending on local provision and individual participants' needs. Therefore, the RETAKE OT liaises with health care professionals providing usual stroke rehabilitation to clarify and agree roles and ensure that any vocational rehabilitation is provided by the RETAKE OT.

The RETAKE OT works in partnership with other health, social care, charitable, employment and independent sector service providers in delivering the ESSVR. Any parallel rehabilitation or other wider services involved (e.g. other OTs, Social Services, Jobcentre Plus, Occupational Health, Different Strokes) are kept informed of the ESSVR process, the RETAKE participant's progress and the RETAKE OTs involvement. RETAKE OTs will refer to, liaise with and help participants to access any service they need, and attend DWP appointments or Occupational Health meetings with participants if required.

Assessment of the impact of the stroke on the person and the job may involve the use standardised assessments of function and impairment e.g. mobility and cognition, functional capacity evaluation, work needs, and detailed job analysis. Specific tools are not prescribed but rather introduced and resources signposted.

|                                                                                                                                                                                            |                                                                                                                                                                                                                                                                                                                                                                                                                                                                                                                                                                                                                                                                                                                                                                                                                                                                                                                                                                                                                                                                                                                                                                                                                                                                                                                                                                                                                                                                                                                                                                                                                                                                                                                                                                                                                                                                                 |
|--------------------------------------------------------------------------------------------------------------------------------------------------------------------------------------------|---------------------------------------------------------------------------------------------------------------------------------------------------------------------------------------------------------------------------------------------------------------------------------------------------------------------------------------------------------------------------------------------------------------------------------------------------------------------------------------------------------------------------------------------------------------------------------------------------------------------------------------------------------------------------------------------------------------------------------------------------------------------------------------------------------------------------------------------------------------------------------------------------------------------------------------------------------------------------------------------------------------------------------------------------------------------------------------------------------------------------------------------------------------------------------------------------------------------------------------------------------------------------------------------------------------------------------------------------------------------------------------------------------------------------------------------------------------------------------------------------------------------------------------------------------------------------------------------------------------------------------------------------------------------------------------------------------------------------------------------------------------------------------------------------------------------------------------------------------------------------------|
|                                                                                                                                                                                            | <p>For more detailed descriptions of the intervention delivered in the feasibility trial see;</p> <p>Grant M. (2016) Developing, delivering and evaluating stroke specific vocational rehabilitation: A feasibility randomised controlled trial (Doctoral dissertation, University of Nottingham).</p> <p>Grant M, Radford K, Sinclair E, Walker M (2014) Return to work after stroke: recording, measuring, and describing occupational therapy intervention. <i>British Journal of Occupational Therapy</i>, 77(9), 457–465.</p>                                                                                                                                                                                                                                                                                                                                                                                                                                                                                                                                                                                                                                                                                                                                                                                                                                                                                                                                                                                                                                                                                                                                                                                                                                                                                                                                              |
| <p><b>WHO PROVIDED</b></p> <p>For each category of intervention provider (e.g. psychologist, nursing assistant), describe their expertise, background and any specific training given.</p> | <p><b>Intervention provider qualifications</b></p> <p>The intervention was delivered by qualified and HealthCare Professions Council (HCPC) registered occupational therapists (OTs).</p> <p><b>Intervention provider background and experience</b></p> <p>The OTs require experience of working with people with stroke and/or other neurological conditions and community rehabilitation experience. Some may have vocational rehabilitation experience.</p> <p>The level of experience and suitability of the therapists recruited to deliver the intervention is assessed by the Chief Investigator and OT mentors prior to training.</p> <p><b>Training provided</b></p> <p>The training comprised 2-days of face-to face teaching delivered by the RETAKE training team (4 OTs experienced in vocational rehabilitation and research) followed by an additional day, 6 months later, supported by monthly small group-based (4-6 OTs) telephone/ videocall mentoring from occupational therapists with extensive experience in delivering vocational rehabilitation following stroke. The OT mentors were members of the training team. Three members of the OT training team held a PhD.</p> <p>The purpose of mentoring is to ensure implementation and fidelity to the intervention process through discussion of difficulties and sharing of best practice with other OTs and their mentor.</p> <p>Prior to training, occupational therapists were signposted to papers relating to the RETAKE feasibility trial findings and were sent a RTW case study, which required them to provide written responses to 6 questions and return to the training team prior to training. This enabled the expert trainers to ascertain the OTs pre-training vocational rehabilitation knowledge. The same case study was used to teach the ESSVR process during the training.</p> |
| <p><b>HOW</b></p>                                                                                                                                                                          | <p><b>Mode of delivery</b></p> <p>The intervention is delivered face-to-face or via telerehabilitation (video call or phone call) on a 1 to 1 basis.</p> <p><b>Other</b></p> <p>Additional time is spent in liaison (letters, phone and video calls) with the patient, employer, family or other stakeholders. Most progress monitoring in stage 3 is delivered by telephone.</p>                                                                                                                                                                                                                                                                                                                                                                                                                                                                                                                                                                                                                                                                                                                                                                                                                                                                                                                                                                                                                                                                                                                                                                                                                                                                                                                                                                                                                                                                                               |
| <p><b>WHERE</b></p>                                                                                                                                                                        | <p><b>Where provided</b></p> <p>The intervention is delivered in the community (mostly in the home or in the workplace). Other locations may include the meeting room of a disability rights charity (13%), and a voluntary organization jobs brokerage centre (7%). In the feasibility trial almost half of the participants were initially seen in hospital or in a stroke rehabilitation unit.</p>                                                                                                                                                                                                                                                                                                                                                                                                                                                                                                                                                                                                                                                                                                                                                                                                                                                                                                                                                                                                                                                                                                                                                                                                                                                                                                                                                                                                                                                                           |

|                                                                                                                                              |                                                                                                                                                                                                                                                                                                                                                                                                                                                                                                                                                                                                                                                                                                                                                                                                                                                                                                                                                                                                                                                                                                                                                               |
|----------------------------------------------------------------------------------------------------------------------------------------------|---------------------------------------------------------------------------------------------------------------------------------------------------------------------------------------------------------------------------------------------------------------------------------------------------------------------------------------------------------------------------------------------------------------------------------------------------------------------------------------------------------------------------------------------------------------------------------------------------------------------------------------------------------------------------------------------------------------------------------------------------------------------------------------------------------------------------------------------------------------------------------------------------------------------------------------------------------------------------------------------------------------------------------------------------------------------------------------------------------------------------------------------------------------|
| <p><b>WHEN and HOW MUCH.</b></p>                                                                                                             | <p><b>Intervention delivery time</b><br/>The intervention commences within 8 weeks of stroke and continues for up to 12 months following the initial session. The duration of intervention and frequency of contacts is determined by individual participant's needs. Based on feasibility trial data (Grant, 2014), two thirds of the OTS time will be spent delivering the intervention either face-to-face or in liaison with the participant and others. The other third is spent writing notes and reports or travelling to see participants at home or their work places.</p> <p><b>Number of sessions and length</b><br/>Based on feasibility trial data the estimated mean number of face-to face sessions per participant is 10 (SD 7, range 1–25) and average session length is one hour. People with more moderate and severe stroke may require more sessions.</p> <p><b>Frequency of sessions</b><br/>More interventions sessions will be delivered at the outset of the intervention during stages 1 and 2 with less frequent interventions in stage 3, during progress monitoring once the participant has RTW.</p>                            |
| <p><b>TAILORING</b><br/>If the intervention was planned to be personalised, titrated or adapted, then describe what, why, when, and how.</p> | <p>The ESSVR intervention will be tailored in duration and frequency according to individual need over a 12-month period.</p>                                                                                                                                                                                                                                                                                                                                                                                                                                                                                                                                                                                                                                                                                                                                                                                                                                                                                                                                                                                                                                 |
| <p><b>MODIFICATIONS</b></p>                                                                                                                  | <p>During the current trial intervention delivery continued according to local NHS Trust protocols throughout the COVID-19 pandemic. In some sites OTs continued to visit participants at home wearing personal protective equipment, in others delivery was via telerehabilitation (online or telephone).</p>                                                                                                                                                                                                                                                                                                                                                                                                                                                                                                                                                                                                                                                                                                                                                                                                                                                |
| <p><b>HOW WELL</b></p>                                                                                                                       | <p><b>Planned</b></p> <p>Throughout the trial fidelity to the intervention process will be measured and monitored as described in Table 2 and summarised below.</p> <p>Frequency duration and dose will be recorded using case report forms (CRFs), capturing Intervention start date and end date, Number of proposed and attended sessions, Whether there was an agreed ending for OT return to work support; Time spent (in minutes) on VR activities per session and from the description of intervention delivered in OT clinical records.</p> <p>Adherence and Factors affecting adherence will be measured using an ESSVR fidelity checklist (Powers, in preparation) and recorded on mentoring CRFs during monthly mentoring sessions led by an experienced vocational rehabilitation OT. implementation barriers and contamination risks will be communicated to the trial team, enabling barriers to be managed in real time.</p> <p>Factors affecting intervention delivery will be recorded in Interviews with RETAKE Therapists, participants with stroke, their employers and other NHS staff as part of a series of embedded case studies.</p> |
| <p>Actual: If intervention adherence or fidelity was assessed,</p>                                                                           |                                                                                                                                                                                                                                                                                                                                                                                                                                                                                                                                                                                                                                                                                                                                                                                                                                                                                                                                                                                                                                                                                                                                                               |



1  
2  
3  
4  
5  
6  
7  
8  
9  
10  
11  
12  
13  
14  
15  
16  
17  
18  
19  
20  
21  
22  
23  
24  
25  
26  
27  
28  
29  
30  
31  
32  
33  
34  
35  
36  
37  
38  
39  
40  
41  
42  
43  
44  
45  
46  
47  
48  
49  
50  
51  
52  
53  
54  
55  
56  
57  
58  
59  
60

|                                                                         |  |
|-------------------------------------------------------------------------|--|
| describe the extent to which the intervention was delivered as planned. |  |
|-------------------------------------------------------------------------|--|

## References

1. [Stroke statistics: sources and definitions | Stroke Association](#) 2021, Accessed 18 September 2021
2. Tyerman A, Meehan M. Vocational assessment and rehabilitation after acquired brain injury: inter-agency guidelines. Royal College of Physicians of London. 2004. <https://www.bsrm.org.uk/downloads/vocational-assessment-rehabilitation-abi.pdf>. Accessed 06 April 2020.
3. Department of Health (DH). National Stroke Strategy. DH. 2007. <https://www.england.nhs.uk/south/wp-content/uploads/sites/6/2017/07/national-stroke-strategy-2007.pdf>. Accessed 06 April 2002.
4. National Institute for Health and Care Excellence (NICE). Stroke rehabilitation in adults: Clinical guideline [CG162]. 2013. <https://www.nice.org.uk/guidance/CG162>. Accessed 06 April 2020.
5. NHS England, National Stroke Service Model, National Stroke Programme, 2021 [national-stroke-service-model-integrated-stroke-delivery-networks-may-2021.pdf \(england.nhs.uk\)](#) Accessed 18 September 2021
6. NHS England. NHS Five Year Forward View: NHS England. 2014. <https://www.england.nhs.uk/wp-content/uploads/2014/10/5yfv-web.pdf>. Accessed 06 April 2020.
7. Intercollegiate Stroke Working Party. National clinical guideline for stroke. 4th ed. Royal College of Physicians. 2012. <https://www.strokeaudit.org/Guideline/Historical-Guideline/National-Clinical-Guidelines-for-Stroke-fourth-edi.aspx>. Accessed 27 May 2020.
8. Department for Work & Pensions and Department of Health (2017) Improving lives. The future of work, health and disability. London: Stationery Office. Available at: [Improving Lives The Future of Work, Health and Disability \(publishing.service.gov.uk\)](#) Accessed 18 September 2021.
9. Black CM, Frost D. Health at work - an independent review of sickness absence. Department for Work and Pensions. 2011. [https://assets.publishing.service.gov.uk/government/uploads/system/uploads/attachment\\_data/file/181060/health-at-work.pdf](https://assets.publishing.service.gov.uk/government/uploads/system/uploads/attachment_data/file/181060/health-at-work.pdf). Accessed 06 April 2020.
10. Sinclair E, Radford K, Grant M, et al. Developing stroke-specific vocational rehabilitation: a soft systems analysis of current service provision. *Disability and Rehabilitation*; 2014; 36:409-17.
11. Royal College of Physicians, Sentinel Stroke National Audit Programme (SSNAP). Post-acute audit. In: Intercollegiate Stroke Working Party (ed.) 2015 Accessible at Sentinel Stroke National Audit Programme (SSNAP) | RCP London, Accessed 18 September 2021
12. Lock S, Jordan L, Bryan K, Maxim J. Work after stroke: focusing on barriers and enablers. *Disability & Society*. 2005; 20: 33–47
13. Royal College of Occupational Therapists (RCOT). Getting my life back: occupational therapy promoting mental health and wellbeing in England. RCOT. 2018. [https://www.kmpt.nhs.uk/media/1059/getting-my-life-back\\_england.pdf](https://www.kmpt.nhs.uk/media/1059/getting-my-life-back_england.pdf). Accessed 12 May 2020.
14. Public Health England (PHE). Health matters: health and work. PHE. 2019. <https://www.gov.uk/government/publications/health-matters-health-and-work/health-matters-health-and-work>. Accessed 12 May 2020. Westerlind et al
15. NHS Outcomes Framework (NHS OF) - NHS Digital Summary Tables: NHS Digital. 2021. <https://files.digital.nhs.uk/satistical/nhs-outcomes-framework>. Accessed 18 September 2021.
16. Department for Work and Pensions (DWP) (2020). The employment of disabled people 2019. Available at: <https://www.gov.uk/government/statistics/the-employment-of-disabled-people-2019>, DWP 2020 Accessed 18 September 2021
17. The Equality Act, (2010) accessible at; <https://www.legislation.gov.uk/ukpga/2010/15/contents>
18. Grant M. Developing, delivering and evaluating stroke specific vocational rehabilitation: a feasibility randomised controlled trial [PhD thesis on the Internet]. Nottingham, UK: University of Nottingham Repository. 2016. <http://eprints.nottingham.ac.uk/35108/>. Accessed 27 May 2020.



- 1
  - 2
  - 3
  - 4
  - 5
  - 6
  - 7
  - 8
  - 9
  - 10
  - 11
  - 12
  - 13
  - 14
  - 15
  - 16
  - 17
  - 18
  - 19
  - 20
  - 21
  - 22
  - 23
  - 24
  - 25
  - 26
  - 27
  - 28
  - 29
  - 30
  - 31
  - 32
  - 33
  - 34
  - 35
  - 36
  - 37
  - 38
  - 39
  - 40
  - 41
  - 42
  - 43
  - 44
  - 45
  - 46
  - 47
  - 48
  - 49
  - 50
  - 51
  - 52
  - 53
  - 54
  - 55
  - 56
  - 57
  - 58
  - 59
  - 60
19. World Health Organisation, The International Classification of Functioning Disability and Health. 2001 Available at: International Classification of Functioning, Disability and Health (ICF) (who.int) (accessed 18 September 2021)
20. Loisel P, Durand M-J, Berthelette D, et al. Disability prevention: New paradigm for the management of occupational back pain. *Disease Management and Health Outcomes*, 2001, 9(7): 351–360.
21. Fadyl J, McPherson KM, Schulter P, Turner-Stokes L. Development of a new tool to evaluate work support needs and guide vocational rehabilitation: The Work-ability Support Scale (WSS), *Disability and Rehabilitation*. 2014. 37:3, 247-258, DOI: 10.3109/09638288.2014.914586
22. Powers K, Clarke S, Cripps R, Holmes JA, Phillips J, Craven K, Farrin A, das Nair R, Radford KA, Developing and testing an implementation fidelity checklist for a complex vocational rehabilitation intervention, in preparation

For peer review only

## Appendix II RETAKE OT Competency Marking Rubric

| Criteria                                                                                                                                                                                                                                   | Needs support                                                                                                                                                                                                                                     | Competent                                                                                                                                                                                                                                                      | Highly competent                                                                                                                                                                                                                                             |
|--------------------------------------------------------------------------------------------------------------------------------------------------------------------------------------------------------------------------------------------|---------------------------------------------------------------------------------------------------------------------------------------------------------------------------------------------------------------------------------------------------|----------------------------------------------------------------------------------------------------------------------------------------------------------------------------------------------------------------------------------------------------------------|--------------------------------------------------------------------------------------------------------------------------------------------------------------------------------------------------------------------------------------------------------------|
|                                                                                                                                                                                                                                            | <p>≤49%</p> <p>Demonstrates some understanding of ESSVR and its application in RETAKE. However, major deficits noted in VR knowledge, clinical reasoning and application. Requires additional individualised mentoring until next assessment.</p> | <p>50-69%</p> <p>Understands ESSVR with some evidence of misinterpretation in its application in RETAKE. Ad hoc monitoring via group mentoring until next assessment.</p>                                                                                      | <p>≥70%</p> <p>Fully understands ESSVR and its application in RETAKE.</p>                                                                                                                                                                                    |
| <p><b>Knowledge of intervention processes, timeframes &amp; documentation</b></p> <p><b>(40% of total marks)</b></p>                                                                                                                       | <p>Most answers were missing the required ESSVR components.</p>                                                                                                                                                                                   | <p>Some answers were missing the required ESSVR components.</p>                                                                                                                                                                                                | <p>Few, if any of the required ESSVR components were missing in the answers.</p>                                                                                                                                                                             |
| <p><b>Clinical reasoning – identification and analysis of salient work-related issues in the case study, to inform the design of an appropriate intervention (ESSVR) plan in the letter/report.</b></p> <p><b>(50% of total marks)</b></p> | <p>Limited identification of and/or limited analysis of work-related issues from the case study. None or few solutions for the work-related issues identified within the intervention plan(s). Significant gaps remain in problem-solving.</p>    | <p>Some identification of and/or some analysis of work-related issues from the case study. A number of solutions for the work-related issues identified within the intervention plan(s) but a few gaps remain in problem-solving.</p>                          | <p>Identification and or analysis of all work-related issues from the case study. Comprehensive solutions for the work-related issues within the intervention plan(s).</p>                                                                                   |
| <p><b>Written communication of work issues. Appropriate use of lay language in letter/report to ensure it is fit for purpose &amp; likely to gain reader engagement.</b></p> <p><b>(10% of total marks)</b></p>                            | <p>Letter/report lacks logical structure. Limited focus of work issue(s) addressed. Overuse of medical terminology. Little use of lay language to communicate issues. Information conveyed in a manner less likely to engage recipient.</p>       | <p>Case study letter/report reasonably well structured. Mostly focused on the work issue(s) being addressed. Minimal use of medical terminology. Good use of lay language to communicate issues. Information conveyed in a manner may to engage recipient.</p> | <p>Case study letter/report very well structured. Report fully focussed on work issue(s) addressed. Issues communicated clearly in lay language and without any use of medical terminology. Information conveyed in a manner likely to engage recipient.</p> |
