# Supplementary material for: RETurn to work After stroKE (RETAKE) Trial: protocol for a mixed-methods process evaluation using normalisation process theory
Source: HighWire-hosted journal article supplement (doi:10.1136/bmjopen-2021-053111), 2022-03-01
Supplement: bmjopen-2021-053111supp002_data_supplement.pdf [file bmjopen-2021-053111supp002_data_supplement.pdf]

## Appendix II RETAKE OT Competency Marking Rubric

| Criteria                                                                                                                                                                                                                                   | Needs support                                                                                                                                                                                                                                     | Competent                                                                                                                                                                                                                                                       | Highly competent                                                                                                                                                                                                                                             |
|--------------------------------------------------------------------------------------------------------------------------------------------------------------------------------------------------------------------------------------------|---------------------------------------------------------------------------------------------------------------------------------------------------------------------------------------------------------------------------------------------------|-----------------------------------------------------------------------------------------------------------------------------------------------------------------------------------------------------------------------------------------------------------------|--------------------------------------------------------------------------------------------------------------------------------------------------------------------------------------------------------------------------------------------------------------|
|                                                                                                                                                                                                                                            | <p>≤49%</p> <p>Demonstrates some understanding of ESSVR and its application in RETAKE. However, major deficits noted in VR knowledge, clinical reasoning and application. Requires additional individualised mentoring until next assessment.</p> | <p>50-69%</p> <p>Understands ESSVR with some evidence of misinterpretation in its application in RETAKE. Ad hoc monitoring via group mentoring until next assessment.</p>                                                                                       | <p>≥70%</p> <p>Fully understands ESSVR and its application in RETAKE.</p>                                                                                                                                                                                    |
| <p><b>Knowledge of intervention processes, timeframes &amp; documentation</b></p> <p><b>(40% of total marks)</b></p>                                                                                                                       | <p>Most answers were missing the required ESSVR components.</p>                                                                                                                                                                                   | <p>Some answers were missing the required ESSVR components.</p>                                                                                                                                                                                                 | <p>Few, if any of the required ESSVR components were missing in the answers.</p>                                                                                                                                                                             |
| <p><b>Clinical reasoning – identification and analysis of salient work-related issues in the case study, to inform the design of an appropriate intervention (ESSVR) plan in the letter/report.</b></p> <p><b>(50% of total marks)</b></p> | <p>Limited identification of and/or limited analysis of work-related issues from the case study. None or few solutions for the work-related issues identified within the intervention plan(s). Significant gaps remain in problem-solving.</p>    | <p>Some identification of and/or some analysis of work-related issues from the case study. A number of solutions for the work-related issues identified within the intervention plan(s) but a few gaps remain in problem-solving.</p>                           | <p>Identification and or analysis of all work-related issues from the case study. Comprehensive solutions for the work-related issues within the intervention plan(s).</p>                                                                                   |
| <p><b>Written communication of work issues. Appropriate use of lay language in letter/report to ensure if it is fit for purpose &amp; likely to gain reader engagement.</b></p> <p><b>(10% of total marks)</b></p>                         | <p>Letter/report lacks logical structure. Limited focus of work issue(s) addressed. Overuse of medical terminology. Little use of lay language to communicate issues. Information conveyed in a manner less likely to engage recipient.</p>       | <p>Case study letter/report reasonably well structured. Mostly focussed on the work issue(s) being addressed. Minimal use of medical terminology. Good use of lay language to communicate issues. Information conveyed in a manner may to engage recipient.</p> | <p>Case study letter/report very well structured. Report fully focussed on work issue(s) addressed. Issues communicated clearly in lay language and without any use of medical terminology. Information conveyed in a manner likely to engage recipient.</p> |

RETAKE OT competency rubric Appendix II
